# Supplementary material for: CROssBAR: comprehensive resource of biomedical relations with knowledge graph representations
Source: PubMed Central journal article supplement (PMC8450100; doi:10.1093/nar/gkab543), 2021-06-28
Supplement: gkab543_supplemental_file.pdf [file gkab543_supplemental_file.pdf]

## **Supplementary Material**

### **CROssBAR: Comprehensive Resource of Biomedical Relations with Knowledge Graph Representations**

Tunca Doğan<sup>1,2,3,4\*</sup>, Heval Atas<sup>3</sup>, Vishal Joshi<sup>4</sup>, Ahmet Atakan<sup>5,6</sup>, Ahmet Sureyya Rifaioglu<sup>5,7</sup>, Esra Nalbat<sup>3</sup>, Andrew Nightingale<sup>4</sup>, Rabie Saidi<sup>4</sup>, Vladimir Volynkin<sup>4</sup>, Hermann Zellner<sup>4</sup>, Rengul Cetin-Atalay<sup>3,8</sup>, Maria Martin<sup>4</sup>, Volkan Atalay<sup>5</sup>

<sup>1</sup> Department of Computer Engineering, Hacettepe University, Ankara, 06800, Turkey

<sup>2</sup> Institute of Informatics, Hacettepe University, Ankara, 06800, Turkey

<sup>3</sup> Cancer Systems Biology Laboratory, Graduate School of Informatics, METU, Ankara, 06800, Turkey

<sup>4</sup> European Molecular Biology Laboratory, European Bioinformatics Institute (EMBL–EBI), Hinxton, Cambridgeshire, CB10 1SD, UK

<sup>5</sup> Department of Computer Engineering, METU, Ankara, 06800, Turkey

<sup>6</sup> Department of Computer Engineering, EBYU, Erzincan, 24002, Turkey

<sup>7</sup> Department of Computer Engineering, İskenderun Technical University, Hatay, 31200, Turkey

<sup>8</sup> Section of Pulmonary and Critical Care Medicine, University of Chicago, Chicago IL, 60637, USA

\* To whom correspondence should be addressed. Tel: +905055250011; Fax: +903122977194; Email: tuncadogan@gmail.com

#### **1. Investigation of COVID-19 Associated Drugs on the COVID-19 Knowledge Graph**

CROssBAR COVID-19 knowledge graph (KG) incorporates several drugs that can be utilized for developing novel treatments against SARS-CoV-2. Several of these drugs have already been reported in the COVID-19 literature and included based on this information; however, some of them were completely new. These new drugs have been incorporated to the graph either due to the overrepresentation-based enrichment analysis (based on the COVID-19 related host genes/proteins in the graph) or predicted to interact to with host or SARS-CoV-2 proteins by our deep-learning-based tools DEEPScreen and MDeePred. Here, we demonstrate a short literature-based validation study on the relevance of these new drugs for COVID-19. Table S6 shows promising drugs in our knowledge graph together with the source (i.e., whether they entered the graph due to enrichment or predicted by DEEPScreen and/or MDeePred). It is interesting to observe that some of the drugs in this list are currently under clinical trials against COVID-19. The list includes calcineurin, IL-6 and IL-17a inhibitors such as cyclosporine, tocilizumab, and ixekizumab, which play roles in the immune system and effective against inflammatory diseases. As an immunomodulator agent, interferon beta-1a is also included in the list, inducing the synthesis of antiviral mediators by binding to type I interferon receptors. In addition to these, there are also other type of drugs in the list such as tenecteplase, vazegepant and simvastatin, which have promising clinical study results especially for the prevention of severe pulmonary damages and respiratory failures due to COVID-19. Ascorbic acid and Epigallocatechin gallate are two examples of natural products that have COVID-19 related clinical studies. Apart from these, other enriched/predicted drugs such as amlodipine (1, 2), arteminol (3)

lifitegrast (4, 5), amcinonide (6) and becatecarin (7) have been reported as potential drugs for COVID-19 via *in vitro*, *in vivo* and/or *in silico* studies including machine learning and molecular docking applications, although some of these studies are yet to be peer-reviewed. As a potent inhibitor of NF- $\kappa$ B activation in T-cells, rocaglamide and its derivatives may also be potential drug candidates for the treatment of COVID-19; however, there is no COVID-19 related study about these drugs in the literature yet, except from a study reviewing antiviral activity potential of rocaglamide as a flavagline (8). It is also important to mention that, further research is required to properly assess the potential of these drugs for repurposing against SARS-CoV-2 infection.

## Supplementary References

1. Zhang, L. K., Sun, Y., Zeng, H., Wang, Q., Jiang, X., Shang, W. J., et al. (2020) Calcium channel blocker amlodipine besylate therapy is associated with reduced case fatality rate of COVID-19 patients with hypertension. *Cell discovery*, 6(1), 1-12.
2. Solaimanzadeh, I. (2020) Nifedipine and amlodipine are associated with improved mortality and decreased risk for intubation and mechanical ventilation in elderly patients hospitalized for COVID-19. *Cureus*, 12(5).
3. Sehailia, M. and Chemat, S. (2020) Antimalarial-agent artemisinin and derivatives portray more potent binding to Lys353 and Lys31-binding hotspots of SARS-CoV-2 spike protein than hydroxychloroquine: potential repurposing of arteminol for COVID-19. *Journal of Biomolecular Structure and Dynamics*, 1-11.
4. Talluri S. (2021) Molecular Docking and Virtual Screening based prediction of drugs for COVID-19. *Combinatorial Chemistry & High Throughput Screening*, 24(5), 716.
5. Day, C. J., Bailly, B., Guillon, P., Dirr, L., Jen, F. E. C., Spillings, B. L., et al. (2021) Multidisciplinary Approaches Identify Compounds that Bind to Human ACE2 or SARS-CoV-2 Spike Protein as Candidates to Block SARS-CoV-2-ACE2 Receptor Interactions. *MBio*, 12(2).
6. Anwar, M. U., Adnan, F., Abro, A., Khan, M. R., Rehman, A. U., Osama, M., et al. (2020) Combined Deep Learning and Molecular Docking Simulations Approach Identifies Potentially Effective FDA Approved Drugs for Repurposing Against SARS-CoV-2. *ChemRxiv* doi:10.26434/chemrxiv.12227363.v1, 09 June 2021, pre-print: not peer-reviewed.
7. Durdagi, S., Aksoydan, B., Dogan, B., Sahin, K., Shahraki, A. and Birgül-Iyison, N. (2020) Screening of Clinically Approved and Investigation Drugs as Potential Inhibitors of SARS-CoV-2 Main Protease and Spike Receptor-Binding Domain Bound with ACE2 COVID19 Target Proteins: A Virtual Drug Repurposing Study. *ChemRxiv* doi:10.26434/chemrxiv.12032712.v2, 09 June 2021, pre-print: not peer-reviewed.
8. Schulz, G., Victoria, C., Kirschning, A. and Steinmann, E. (2021) Rocaglamide and silvestrol: a long story from anti-tumor to anti-coronavirus compounds. *Natural Product Reports*, 38(1), 18-23.
9. Kuleshov, M. V., Jones, M. R., Rouillard, A. D., Fernandez, N. F., Duan, Q., Wang, Z., et al. (2016) Enrichr: a comprehensive gene set enrichment analysis web server 2016 update. *Nucleic acids research*, 44(W1), W90-W97.
10. Liao, Y., Wang, J., Jaehnig, E. J., Shi, Z. and Zhang, B. (2019) WebGestalt 2019: gene set analysis toolkit with revamped UIs and APIs. *Nucleic acids research*, 47(W1), W199-W205.

# Supplementary Figures

## Figure S1

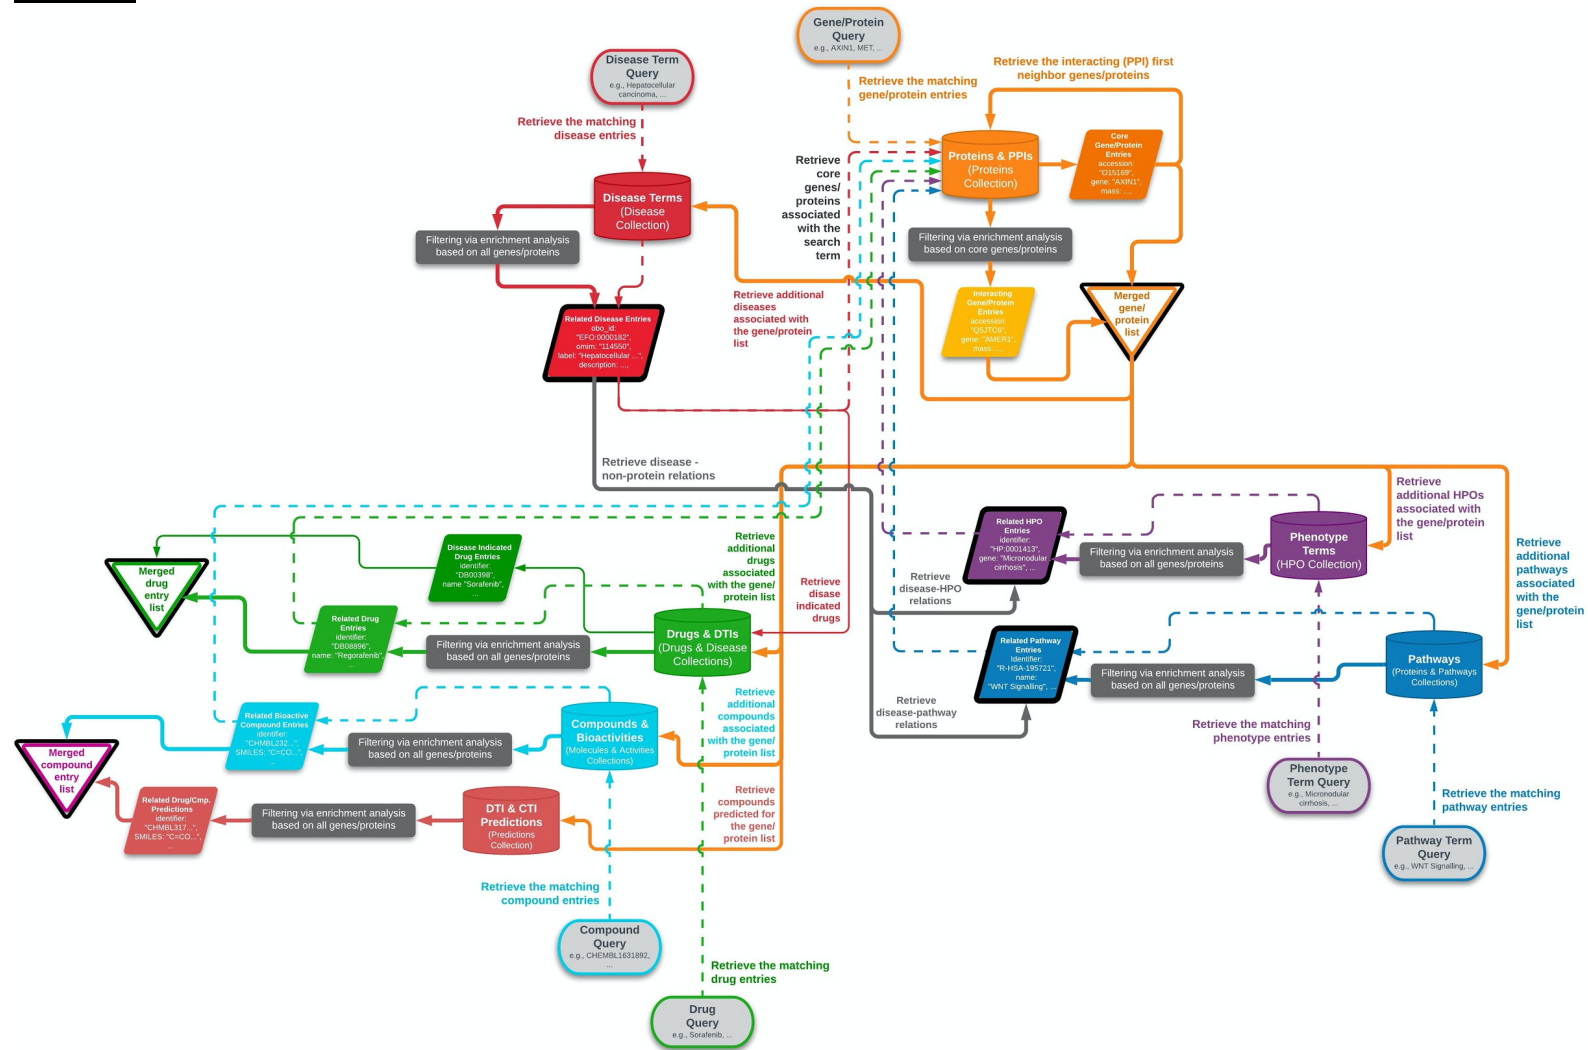

Figure S1. Full-scale work-flow of the CROSSBAR knowledge graph construction process.

## Figure S2

(a)

swagger Select a spec default

### CROssBAR Data API <sup>1.0</sup>

[ Base URL: [www.e01.ac.uk/Tools/crossbar/](http://www.e01.ac.uk/Tools/crossbar/) ]  
<https://www.ebi.ac.uk/Tools/crossbar/v2/api-docs>

#### About CROssBAR & data

**CROssBAR:** Comprehensive Resource of Biomedical Relations with Deep Learning Applications and Knowledge Graph Representations  
CROssBAR is a comprehensive system that integrates large-scale biomedical data from various resources e.g UniProt, ChEMBL, Drugbank, EFO, HPO, InterPro & PubChem and stores them in a new NoSQL database, enrich these data with deep learning based prediction of relations between numerous biomedical entities, rigorously analyse the enriched data to obtain biologically meaningful modules and display them to the user via easy to interpret, interactive and heterogeneous knowledge graphs.  
CROssBAR platform exposes a set of 12 endpoints to query data stored in the CROssBAR database. These endpoints help the user to find data of interest using different parameters provided by the API endpoint.  
For example,  
<https://www.ebi.ac.uk/Tools/crossbar/proteins?accession=A0A023GRW5> -> will provide protein information about accession 'A0A023GRW5' including its interactions, functions, cross-references, variations and more.  
<https://www.ebi.ac.uk/Tools/crossbar/activities?moleculeChEMBLid=ChEMBL465983> -> will provide ChEMBL bio-interactions related information including targets and bio-activity measurements associated with molecule chEMBL id 'ChEMBL465983'

**Knowledge graphs**  
Another use case of CROssBAR's API endpoints is in building knowledge graphs. These endpoints can be *weaved together* (output from one API endpoint fed as input to another API endpoint) programmatically to link nodes like protein, disease, drugs etc. as nodes of the graph. The endpoints are designed to be independent from each other which allows users the flexibility to drive biological networks from any facet e.g drug-centric, disease-centric, gene-centric etc. Our service for knowledge graph construction is available at <https://crossbar.kansli.org>.  
An example for the part of the background queries on the CROssBAR API during the construction of a knowledge graph, (with the aim of keeping the example simple, we have only included the processes related to pathways, genes/proteins and drugs/compounds)  
In this example, we would like to find bio-active compounds (with a pChEMBL value threshold of at least 6.0) & drugs targeting all proteins belonging to "WNT ligand biogenesis and trafficking" pathway (based on Reactome pathway annotations).  
This can be achieved by using endpoints listed on this swagger documentation as illustrated in following steps-  
Find bio-active compounds (with a pChEMBL value threshold of at least 6.0) & drugs targeting all proteins belonging to "WNT ligand biogenesis and trafficking" pathway (based on Reactome annotations)  
This can be achieved by using endpoints listed on [this swagger documentation](#) as illustrated in following steps-

1. Get all proteins from "/proteins" API endpoint which have a reactome pathway name equal to "WNT ligand biogenesis and trafficking".
2. From the collection of uniprot protein accessions collected from step 1 above, we query "targets" API endpoint to obtain the target\_chEMBL\_id's of these proteins.
3. From the collection of target\_chEMBL\_id's collected from step 2 above, we query "activities" API endpoint with pChEMBL value >=6, to obtain the 'molecule\_chEMBL\_id's of the molecules that we need.
4. From the collection of uniprot protein accessions collected from step 1 above, we find out Drug names and ids from the "/drugs" API endpoint that targets our proteins.
5. From the collection of 'molecule\_chEMBL\_id's obtained in step3, we query "molecules" endpoint to get the compounds that are interacting with the genes/proteins belonging to the "WNT ligand biogenesis and trafficking" pathway.

[Contact API support](#)

|                                                             |   |
|-------------------------------------------------------------|---|
| <b>Activities</b> ChEMBL Activities Resource                | > |
| <b>Assays</b> ChEMBL Assays Resource                        | > |
| <b>Drugs</b> Drug Resource                                  | > |
| <b>EFO disease terms</b> EFO Resource                       | > |
| <b>HPO</b> HPO Resource                                     | > |
| <b>Intact</b> Intact Resource                               | > |
| <b>Molecules</b> ChEMBL Molecules Resource                  | > |
| <b>Proteins</b> Protein Resource                            | > |
| <b>PubChem Bioassay Sids</b> Pubchem Bioassay Sids Resource | > |
| <b>PubChem Bioassays</b> Pubchem Bioassay Resource          | > |
| <b>PubChem Compounds</b> Pubchem Compound Resource          | > |
| <b>PubChem Substances</b> Pubchem Substance Resource        | > |
| <b>Targets</b> ChEMBL Targets Resource                      | > |
| <b>Models</b>                                               | > |

(b)

The screenshot shows the Swagger UI for the 'EFO disease terms' endpoint. The interface is titled 'Drugs Drug Resource' and 'EFO disease terms EFO Resource'. The endpoint is 'GET /efo Get EFO diseases data'. The parameters section is as follows:

| Name                        | Description                                           |
|-----------------------------|-------------------------------------------------------|
| doid                        | doid                                                  |
| array[string]<br>(query)    | <input type="text"/> Add Item                         |
| label                       | label                                                 |
| array[string]<br>(query)    | <input type="text"/> - Add Item                       |
| limit                       | limit                                                 |
| integer(\$int32)<br>(query) | <input type="text" value="10"/>                       |
| mesh                        | mesh                                                  |
| array[string]<br>(query)    | <input type="text"/> Add Item                         |
| obold                       | obold                                                 |
| array[string]<br>(query)    | <input type="text"/> Add Item                         |
| omimid                      | omimid                                                |
| array[string]<br>(query)    | <input type="text"/> Add Item                         |
| page                        | page                                                  |
| integer(\$int32)<br>(query) | <input type="text" value="0"/>                        |
| synonym                     | synonym                                               |
| array[string]<br>(query)    | <input type="text" value="breast cancer"/> - Add Item |

Buttons: Execute, Clear

(c)

The screenshot shows the 'Responses' section of the Swagger UI. The response content type is 'application/json'. The curl command is: `curl -X GET "https://wwwdev.ebi.ac.uk/crossbar/efo?label=&limit=10&page=0&synonym=breast%20cancer" -H "accept: application/json"`. The request URL is: `https://wwwdev.ebi.ac.uk/crossbar/efo?label=&limit=10&page=0&synonym=breast%20cancer`. The server response is 200. The response body is a JSON object:

```
{
  "diseases": [
    {
      "obo_id": "EFO:0002831",
      "label": "Basal-like breast carcinoma",
      "short_form": "EFO_0002831",
      "synonyms": [
        "basal-like breast cancer",
        "basal-like subtype of breast carcinoma",
        "basal-like breast carcinoma"
      ],
      "description": [
        "basal breast tumor is a high grade, triple-negative breast tumor, i.e. they express no estrogen receptor, progesterone receptor nor Her2/neu proteins.",
        "A biologic subset of breast carcinoma defined by high expression of genes characteristic of basal epithelial cells, including KRT5 and KRT17, annexin B, CX3CL1, and TRIM29, and usually by lack of expression of the estrogen receptor (ER), progesterone receptor (PR), and human epidermal growth factor receptor 2 (HER2). It is the most common subtype of breast cancer associated with BRCA1 mutations, and is associated with a poor prognosis."
      ],
      "doid": [],
      "icd9": [],
      "mesh": [],
      "snomed": [],
      "ncit": [
        "NCIT:C53558",
        "NCIT:C53558"
      ]
    }
  ]
}
```

Response headers:

```
accept-ranges: bytes
content-type: application/json;charset=UTF-8
date: Sun, 14 Jun 2020 18:19:57 GMT
status: 200
x-cache-info: caching
```

**Figure S2.** CROsSBAR API Swagger web interface (<https://www.ebi.ac.uk/Tools/crossbar/swagger-ui.html>); **(a)** names of 12 endpoints at the main page; **(b)** an example API query on EFO disease terms collection with "breast cancer" searched as the synonymous term name; **(c)** query response: the same query in command line and as URL, and the list of resulting database entries that match the query together with their attributes.

(a)

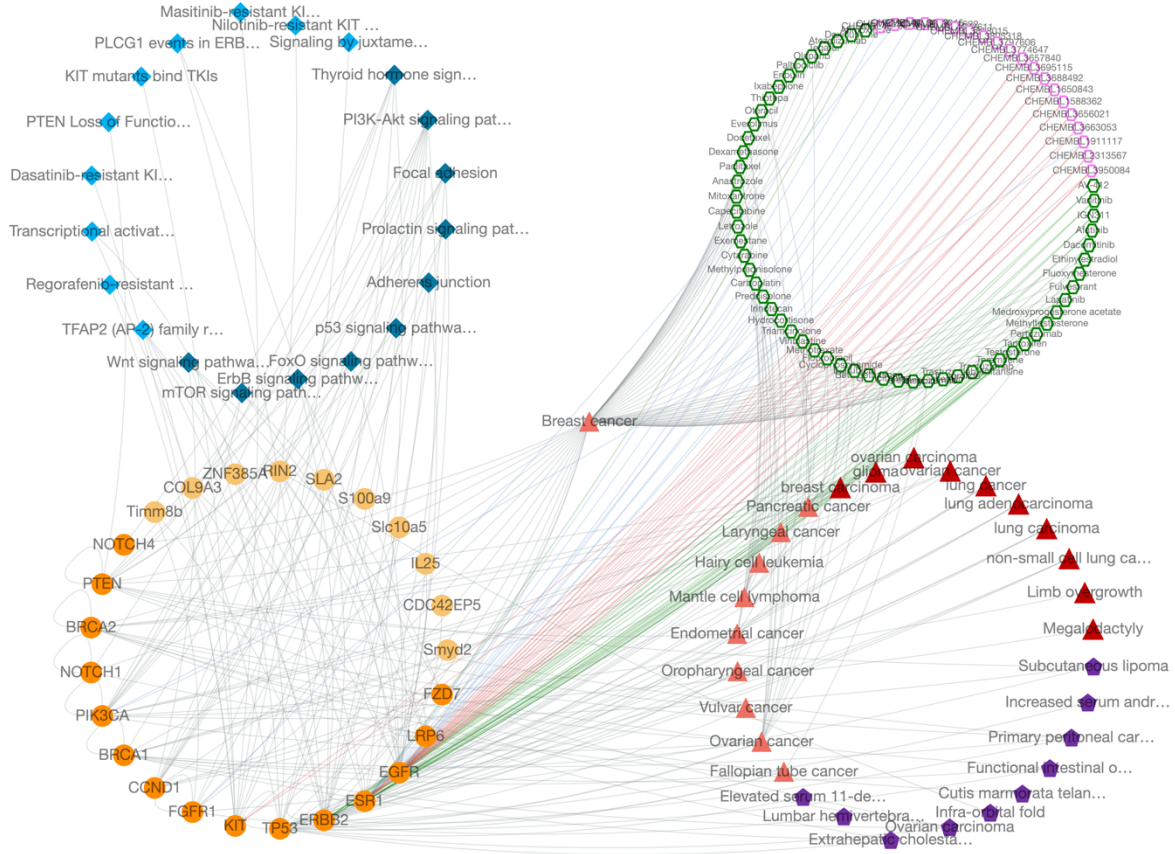

(b)

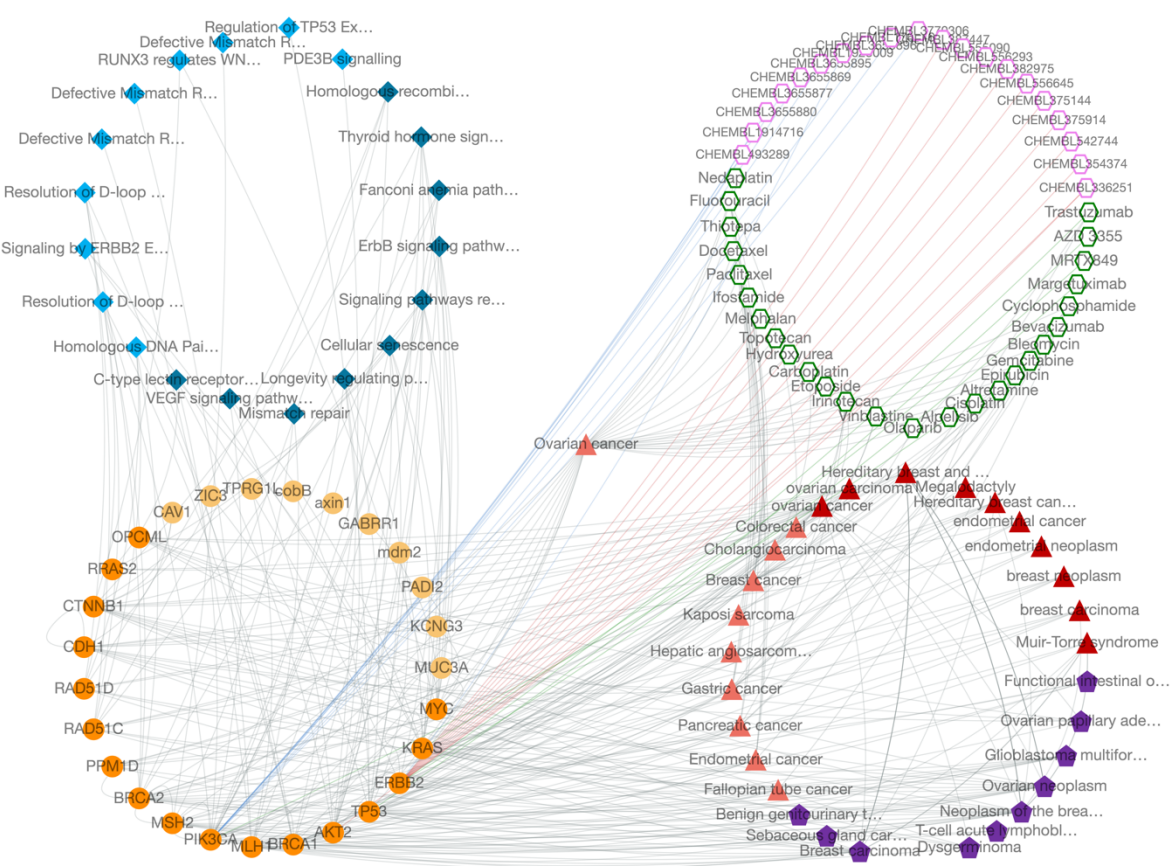

(c)

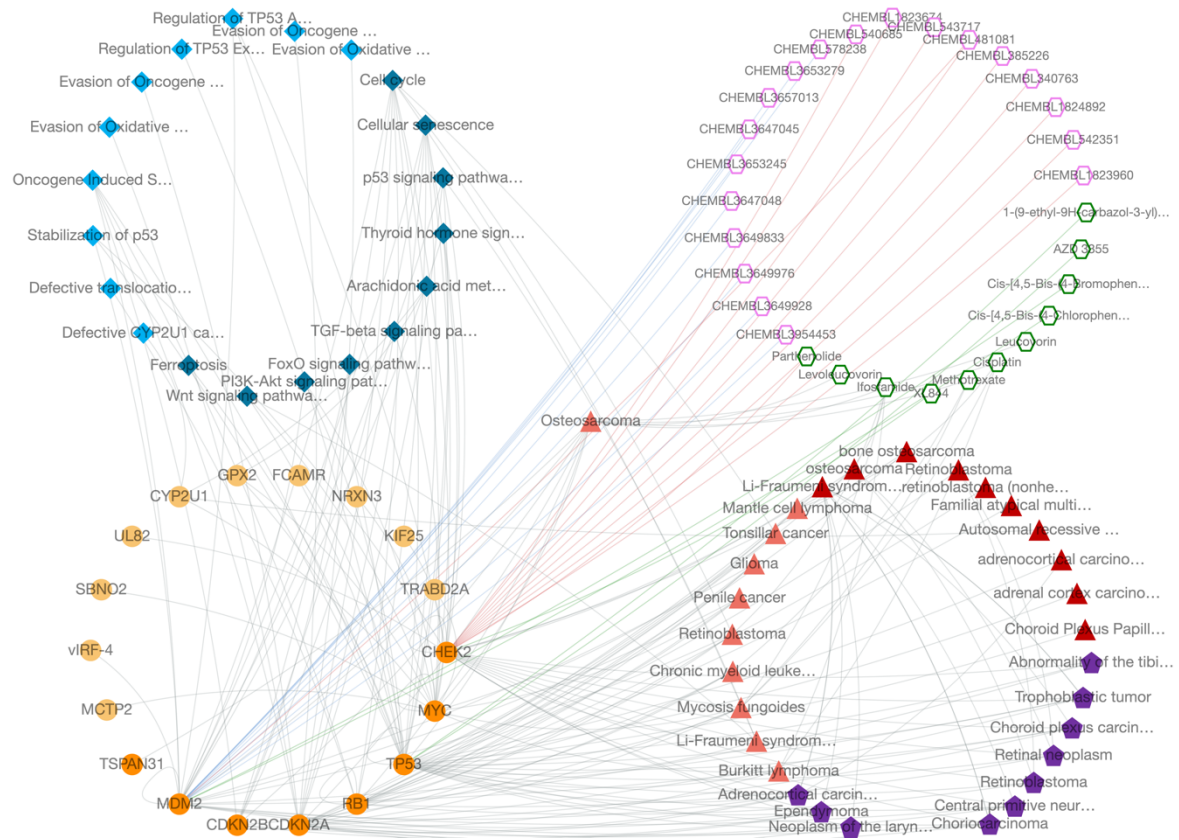

**Figure S3.** CROsBAR knowledge graph diversity analysis use-case, output KGs of disease queries: (a) breast cancer, (b) ovarian cancer, and (c) osteosarcoma.



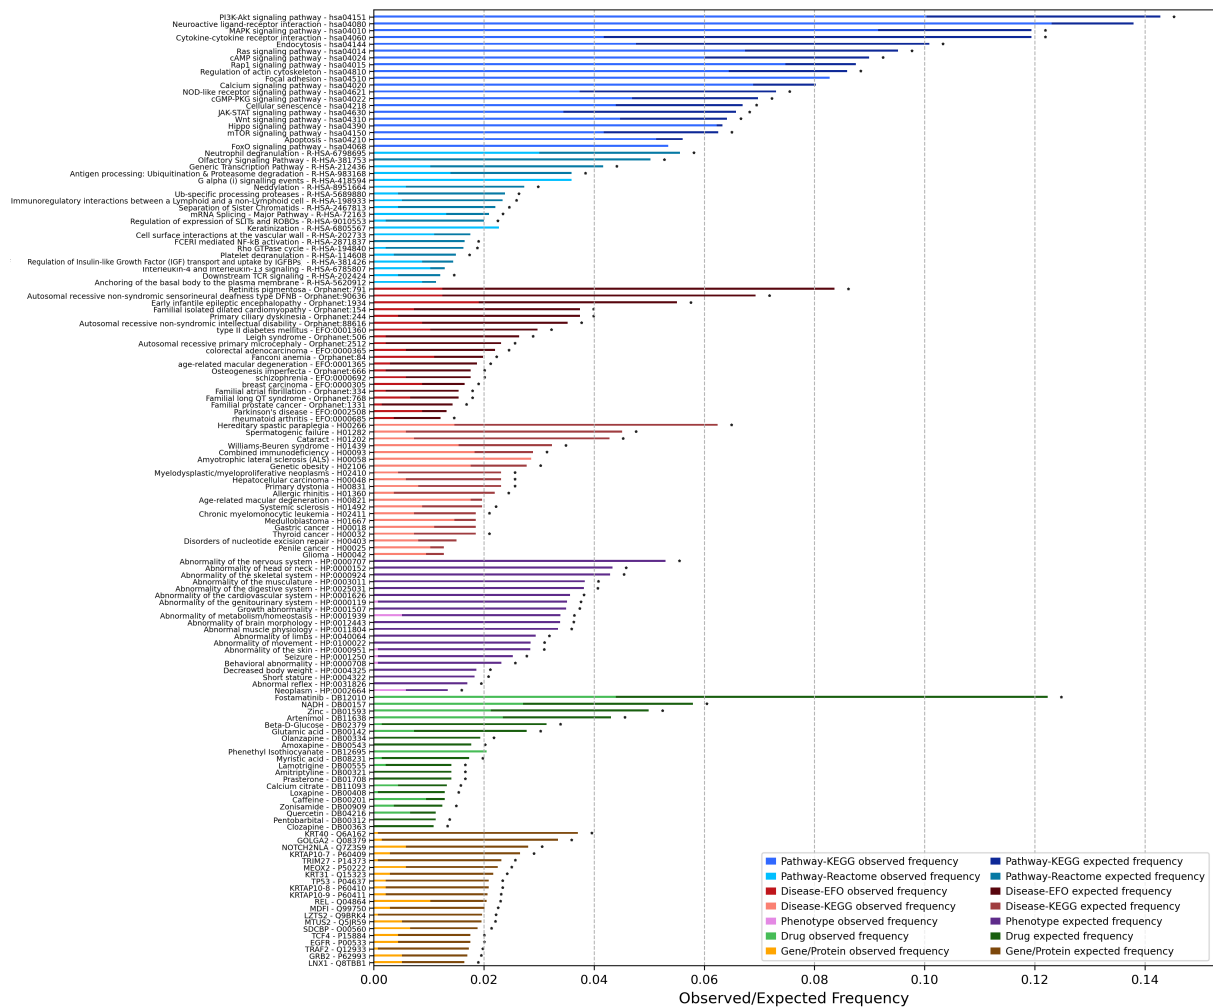

**Figure S4.** Bar graphs indicating observed and expected frequencies (overlapping bars with different shades of colours) for each of the 140 selected highly connected/hub terms in 1365 CROsBAR knowledge graphs constructed with random term queries. “\*” indicate that the corresponding observed frequency is statistically significantly lower compared to the expected frequency according to Fisher’s exact test.

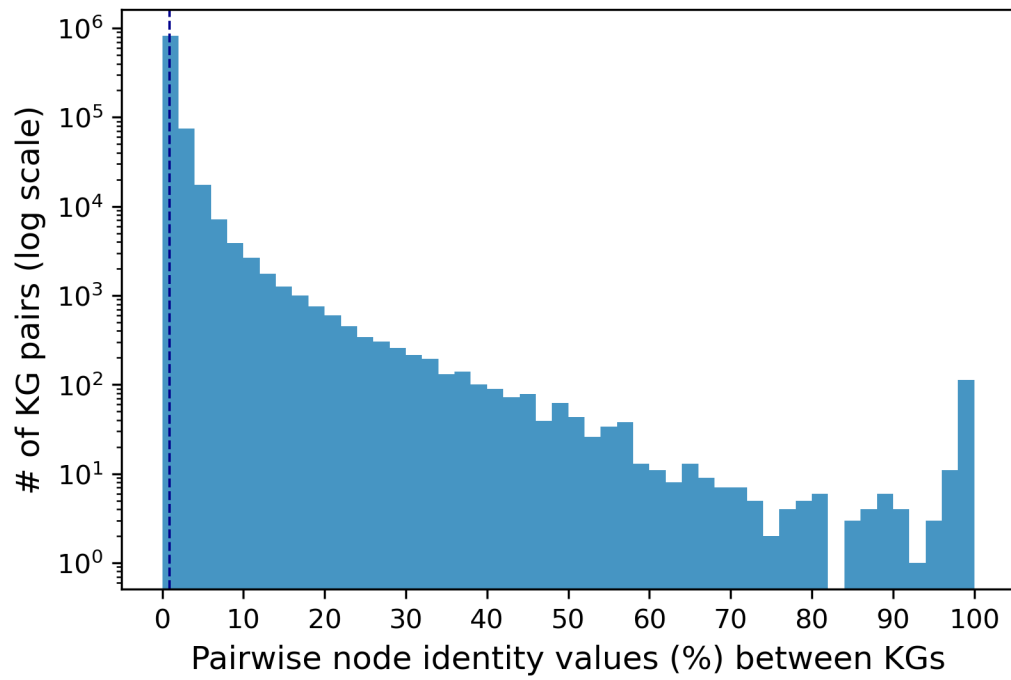

**Figure S5.** pairwise node identity percentage histogram (in log scale) between all KG pair combinations (930930 measurements) in our 1365 CROssBAR knowledge graphs constructed with random term queries.

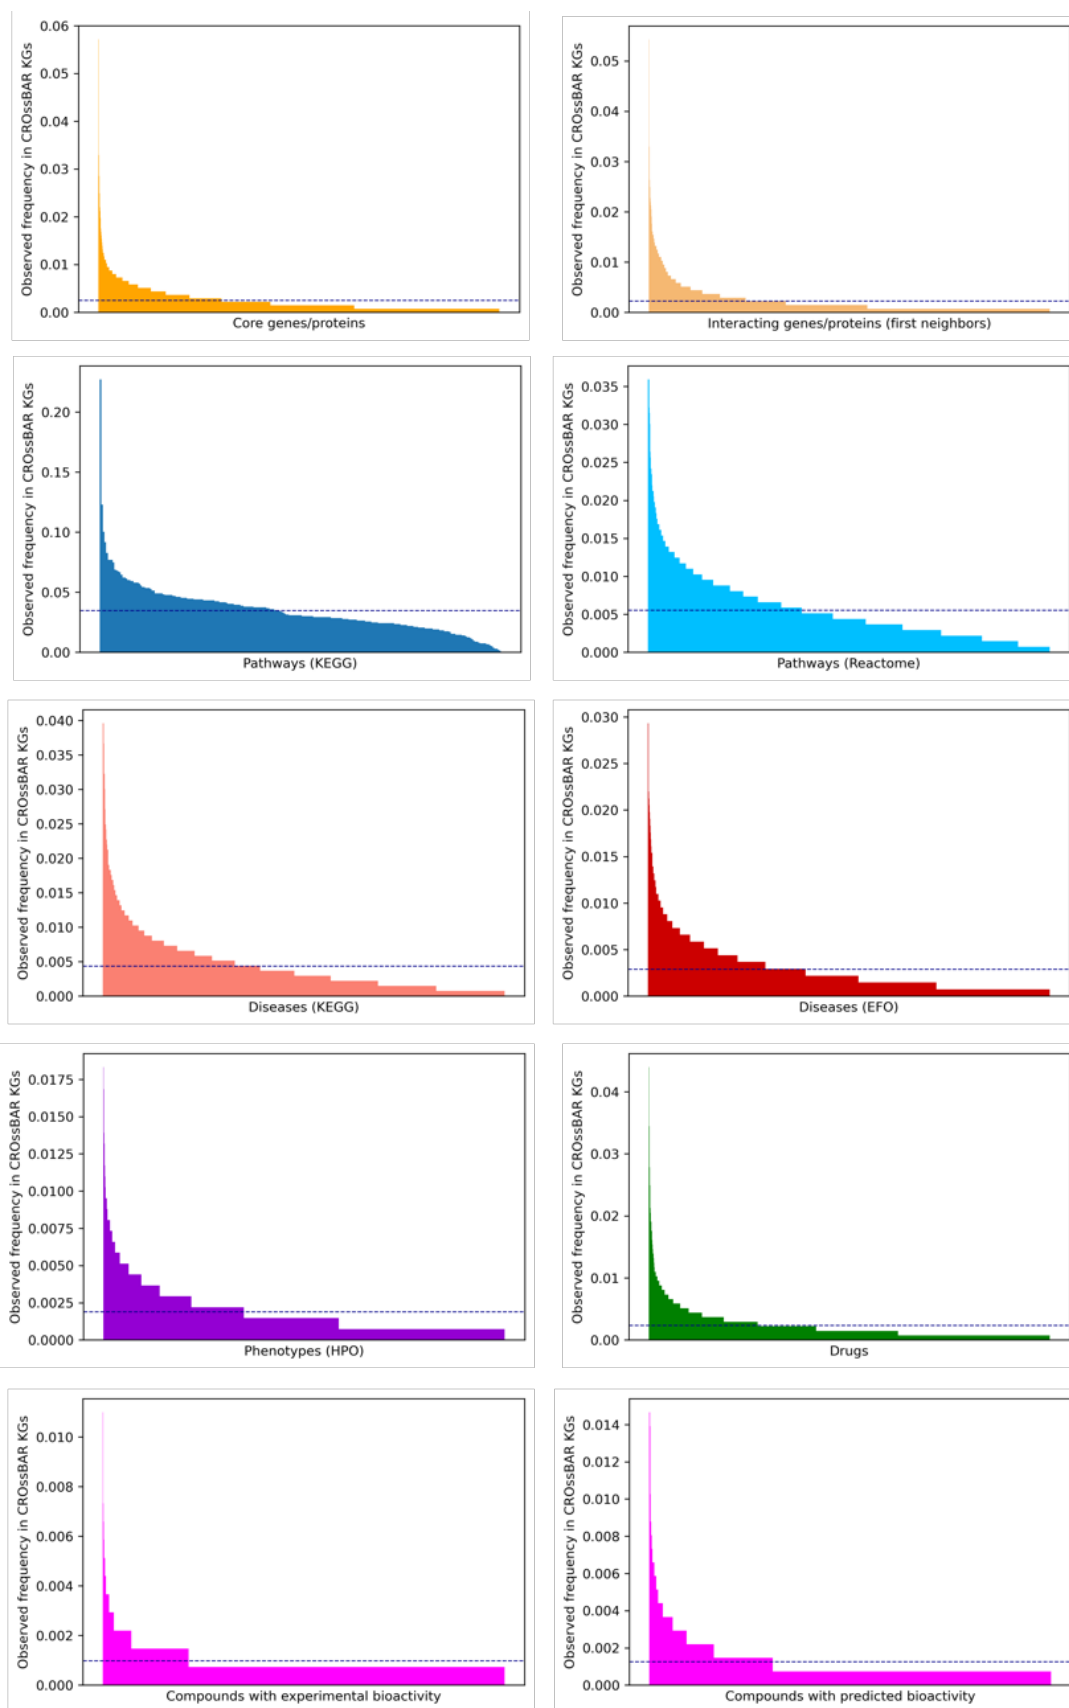

**Figure S6.** Biological component-wise bar graphs indicating observed frequencies (in vertical axis) of all terms (in horizontal axis by ranking the terms according to decreasing frequencies) that are presented in our 1365 CROsBAR knowledge graphs constructed with random term queries.

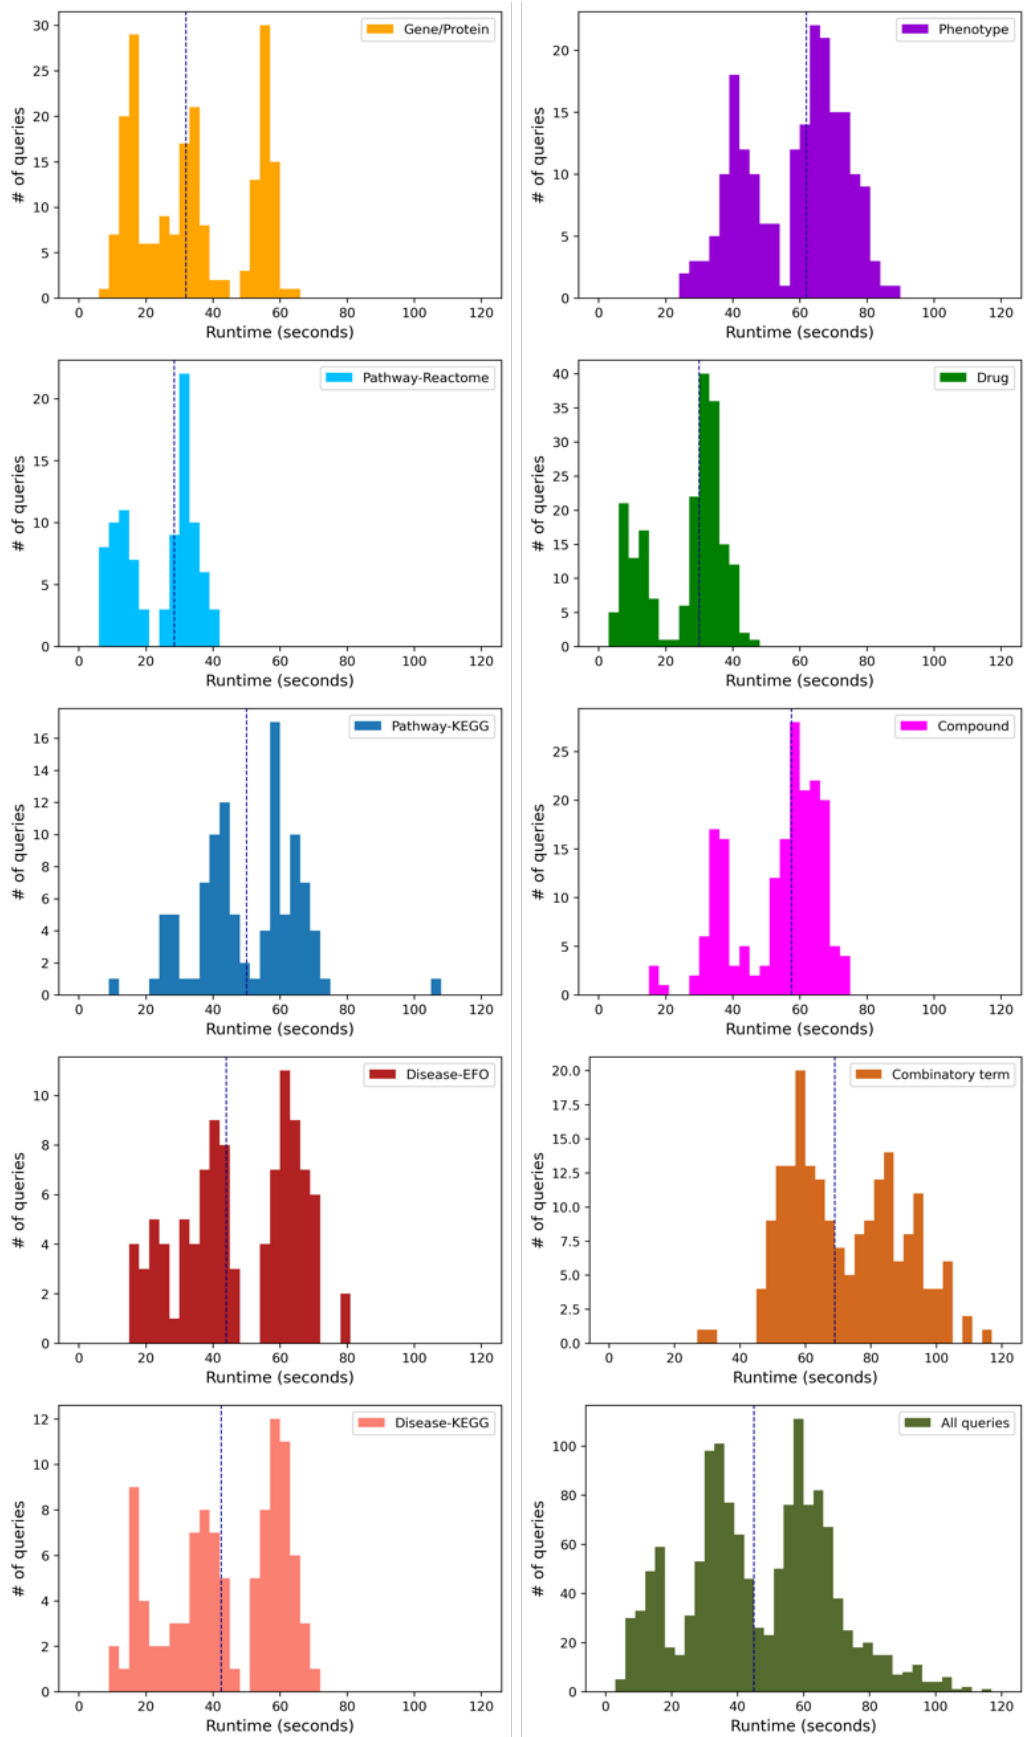

**Figure S7.** Biological component-wise query runtime histograms of 1365 CROssBAR knowledge graphs constructed with random term queries.

## Supplementary Tables

**Table S1.** CROsBAR database statistics.

| High-level data component group | Specific biomedical component | Number of entries |
|---------------------------------|-------------------------------|-------------------|
| Genes/Proteins (UniProt)        | Genes                         | 122,930           |
|                                 | Proteins                      | 608,350           |
|                                 | Proteins w/ PPI               | 55,689            |
|                                 | PPIs                          | 852,820           |
|                                 | Protein Domain Annotations    | 949,175           |
| Bioactivities (ChEMBL)          | Bioassays                     | 1,358,549         |
|                                 | Compounds                     | 2,086,898         |
|                                 | Bioactivities                 | 17,276,334        |
|                                 | Targets                       | 14,347            |
| Bioactivities (PubChem)         | Bioassays                     | 1,067,568         |
|                                 | Compounds                     | 97,351,543        |
|                                 | Substances                    | 252,877,567       |
|                                 | Bioactivities                 | 268,562,338       |
| Drugs (DrugBank)                | Drugs                         | 14,315            |
|                                 | Targets                       | 4,867             |
|                                 | DTIs                          | 18,866            |
| Diseases (KEGG+EFO)             | EFO Disease Terms             | 27,415            |
|                                 | EFO Genes (Unique #)          | 4,272             |
|                                 | EFO Annotations               | 14,062            |
|                                 | KEGG Disease Terms            | 1,901             |
|                                 | KEGG Disease Genes (Unique #) | 3,710             |
|                                 | KEGG Disease Annotations      | 6,040             |
| Phenotypes (HPO)                | HPO Terms                     | 9,595             |
|                                 | HPO related Genes (Unique #)  | 4,531             |
|                                 | HPO Annotations               | 645,861           |
| Pathways (KEGG+Reactome)        | KEGG Pathway Terms            | 337               |
|                                 | KEGG Pathway Genes (Unique #) | 8,040             |
|                                 | KEGG Pathway Annotations      | 32,516            |
|                                 | Reactome Terms                | 7,254             |
|                                 | Reactome Proteins (Unique #)  | 43,034            |
|                                 | Reactome Annotations          | 136,242           |

**Table S2.** List of the differentially expressed genes (DEGs) of chloroquine phosphate treated liver cells (Huh7 and Mahlavu), with a p-value cut-off < 0.01.

**Cell line: Huh7**

| Gene name | Log2 fold change | p-value  | probe.ID            |
|-----------|------------------|----------|---------------------|
| ABL1      | 0.183            | 0.000546 | NM_005157.3:3200    |
| ANGPT1    | -0.171           | 0.00108  | NM_001146.3:2080    |
| ARID1A    | 0.203            | 0.000134 | NM_006015.4:5495    |
| ATM       | -0.25            | 0.000887 | NM_138292.3:6688    |
| B2M       | 0.132            | 0.00608  | NM_004048.2:25      |
| BAMBI     | -0.171           | 0.00145  | NM_012342.2:832     |
| BAP1      | -0.149           | 0.00279  | NM_004656.2:240     |
| BCL2L1    | -0.192           | 1.66E-05 | NM_138578.1:1560    |
| BCOR      | -0.369           | 0.00449  | NM_001123383.1:1630 |
| BID       | 0.189            | 0.00203  | NM_197966.1:2095    |
| BNIP3     | 0.149            | 0.000208 | NM_004052.2:325     |
| BRCA2     | 0.0707           | 0.00607  | NM_000059.3:115     |
| C19orf40  | 0.355            | 3.51E-06 | NM_152266.3:376     |
| CAPN2     | -0.513           | 0.00282  | NM_001748.4:2085    |
| CASP8     | -0.105           | 0.00304  | NM_001228.4:301     |
| CCNA2     | -0.0804          | 0.00201  | NM_001237.2:1210    |
| CCNB1     | -0.0811          | 0.00251  | NM_031966.2:715     |
| CCNE2     | 0.218            | 0.00156  | NM_057735.1:50      |
| CDC25A    | 0.0634           | 0.00529  | NM_001789.2:690     |
| CDC6      | -0.0589          | 0.00767  | NM_001254.3:1300    |
| CDH1      | 0.164            | 0.00136  | NM_004360.2:1230    |
| CDK2      | -0.179           | 0.00541  | NM_001798.2:220     |
| CDK4      | 0.104            | 0.00765  | NM_000075.2:1055    |
| CDKN2D    | -0.554           | 0.0024   | NM_001800.3:870     |
| CEBPA     | 0.137            | 0.00866  | NM_004364.2:1320    |
| COL2A1    | 0.417            | 1.56E-05 | NM_001844.4:4745    |
| CREB3L3   | 0.294            | 0.000332 | NM_001271995.1:1050 |
| CREB5     | -0.228           | 0.00118  | NM_182898.2:1885    |
| CSF3R     | 0.675            | 0.00275  | NM_156038.2:90      |
| CUL1      | 0.111            | 1.11E-05 | NM_003592.2:1487    |
| DAXX      | -0.117           | 0.0084   | NM_001350.3:1875    |
| DDIT3     | 0.5              | 1.98E-05 | NM_004083.4:40      |
| DKK1      | -0.16            | 0.000474 | NM_012242.2:75      |
| DNMT1     | -0.075           | 0.00034  | NM_001379.2:1495    |
| DUSP4     | 0.282            | 0.000107 | NM_057158.2:3115    |
| DUSP5     | 0.128            | 0.000351 | NM_004419.3:675     |
| E2F5      | -0.0998          | 0.00168  | NM_001951.3:444     |
| EFNA1     | 0.285            | 0.00906  | NM_004428.2:650     |
| EIF4EBP1  | -0.0695          | 0.0105   | NM_004095.3:363     |
| ENDOG     | -0.106           | 0.00731  | NM_004435.2:694     |
| EP300     | 0.139            | 0.00345  | NM_001429.2:715     |
| EPHA2     | -0.208           | 0.00263  | NM_004431.2:1525    |

| Gene name | Log2 fold change | p-value  | probe.ID            |
|-----------|------------------|----------|---------------------|
| IL6R      | 0.558            | 0.00014  | NM_000565.2:993     |
| IL8       | 0.321            | 1.32E-05 | NM_000584.2:25      |
| ITGA2     | -0.115           | 0.00566  | NM_002203.2:475     |
| ITGB8     | 0.383            | 8.61E-05 | NM_002214.2:2609    |
| JAG1      | -0.145           | 0.00865  | NM_000214.2:915     |
| JAK2      | 0.222            | 0.0055   | NM_004972.2:455     |
| KAT2B     | 0.229            | 0.00372  | NM_003884.3:1220    |
| KDM5C     | 0.0422           | 0.000153 | NM_004187.2:1170    |
| KMT2C     | 0.136            | 0.00696  | NM_170606.2:12505   |
| KMT2D     | -0.127           | 0.000176 | NM_003482.3:6070    |
| LFNG      | -0.755           | 0.000944 | NM_001040168.1:717  |
| LIFR      | 0.0762           | 0.00956  | NM_002310.3:2995    |
| MAD2L2    | -0.223           | 6.49E-05 | NM_001127325.1:290  |
| MAML2     | -0.806           | 0.00055  | NM_032427.1:4125    |
| MAP2K1    | -0.0886          | 0.00458  | NM_002755.2:970     |
| MAP3K14   | 0.506            | 0.000158 | NM_003954.1:620     |
| MAPK8     | 0.0894           | 0.00051  | NM_002750.2:945     |
| MCM2      | -0.148           | 0.00264  | NM_004526.2:2945    |
| MNAT1     | 0.0794           | 0.00721  | NM_002431.2:975     |
| MSH6      | -0.0825          | 0.00904  | NM_000179.1:3525    |
| MYC       | 0.0783           | 0.0014   | NM_002467.3:1610    |
| NASP      | -0.221           | 0.000635 | NM_172164.1:2970    |
| NF1       | -0.0983          | 0.00692  | NM_000267.2:1035    |
| NFE2L2    | -0.178           | 0.000167 | NM_006164.3:995     |
| NFKBIZ    | 0.308            | 0.000801 | NM_001005474.1:2030 |
| NOTCH1    | 0.0941           | 0.00144  | NM_017617.3:735     |
| NPM1      | -0.383           | 0.000825 | NM_002520.5:10      |
| NRAS      | -0.0928          | 0.000532 | NM_002524.3:877     |
| NTHL1     | -0.241           | 0.00124  | NM_002528.5:476     |
| NUMBL     | 0.364            | 0.00397  | NM_004756.3:591     |
| NUPR1     | 1.1              | 0.00249  | NM_001042483.1:829  |
| PAK7      | -0.28            | 0.00347  | NM_177990.1:615     |
| PDGFA     | -0.558           | 0.00911  | NM_002607.5:2460    |
| PDGFC     | -0.243           | 7.72E-06 | NM_016205.1:10      |
| PDGFRB    | -0.198           | 0.00372  | NM_002609.3:840     |
| PIK3R3    | 0.216            | 0.000351 | NM_003629.3:1800    |
| PIM1      | 0.478            | 0.000563 | NM_002648.2:1630    |
| PLAU      | 0.474            | 0.000477 | NM_002658.2:793     |
| POLD1     | -0.394           | 0.00403  | NM_002691.2:2392    |
| POLR2H    | -0.126           | 0.00098  | NM_001278698.1:940  |
| PPARG     | -0.263           | 0.000212 | NM_015869.3:1035    |
| PPP3CA    | -0.319           | 0.000434 | NM_000944.4:3920    |

|          |         |          |                     |
|----------|---------|----------|---------------------|
| EPOR     | 0.314   | 0.000218 | NM_000121.2:1295    |
| ERBB2    | 0.127   | 0.00756  | NM_004448.2:2380    |
| ETV1     | -0.145  | 0.00276  | NM_004956.4:1719    |
| ETV4     | -0.153  | 0.0027   | NM_001079675.1:1535 |
| FANCB    | 0.423   | 0.00158  | NM_152633.2:2470    |
| FANCE    | -0.466  | 0.000715 | NM_021922.2:1275    |
| FANGC    | -0.201  | 0.00355  | NM_004629.1:1900    |
| FGFR2    | 0.503   | 0.00163  | NM_000141.4:647     |
| FGFR3    | -0.0863 | 0.0065   | NM_022965.2:3170    |
| FLNA     | -0.362  | 0.000317 | NM_001456.3:7335    |
| FN1      | -0.0797 | 0.000226 | NM_212482.1:1776    |
| FOS      | 1.05    | 1.68E-05 | NM_005252.2:1475    |
| FST      | -0.141  | 0.000331 | NM_006350.2:575     |
| FUT8     | 0.247   | 0.000113 | NM_004480.4:2841    |
| GADD45A  | 0.345   | 7.75E-05 | NM_001924.2:865     |
| GNA11    | -0.164  | 0.00319  | NM_002067.1:555     |
| GNAQ     | -0.165  | 0.00862  | NM_002072.2:1100    |
| GNAS     | 0.0653  | 0.00911  | NM_080425.1:1910    |
| GNG12    | -0.151  | 0.000221 | NM_018841.3:245     |
| GNG4     | -0.279  | 0.00275  | NM_004485.2:215     |
| GNG7     | 0.24    | 0.00458  | NM_052847.1:3920    |
| GTF2H3   | 0.0392  | 0.00241  | NM_001516.3:70      |
| H3F3A    | -0.108  | 0.000457 | NM_002107.3:190     |
| HDAC1    | -0.183  | 0.000104 | NM_004964.2:785     |
| HIST1H3H | -0.0973 | 7.93E-05 | NM_003536.2:355     |
| HMGA1    | -0.183  | 0.00252  | NM_145904.1:871     |
| HMGA2    | -0.111  | 0.00275  | NM_003484.1:328     |
| HOXA9    | 0.289   | 0.00278  | NM_152739.3:1015    |
| HSPA2    | -0.347  | 0.00214  | NM_021979.3:2095    |
| ID2      | 0.0544  | 0.00489  | NM_002166.4:505     |
| IDH1     | 0.2     | 0.00181  | NM_005896.2:105     |
| IGFBP3   | -0.351  | 0.000131 | NM_000598.4:1255    |
| IKBK     | 0.379   | 8.18E-05 | NM_003639.2:470     |
| IL1R1    | 0.362   | 0.000269 | NM_000877.2:4295    |

|         |        |          |                     |
|---------|--------|----------|---------------------|
| PRKCA   | -0.123 | 0.000426 | NM_002737.2:5560    |
| PRKDC   | -0.075 | 0.00354  | NM_006904.6:12750   |
| PRKX    | -0.341 | 0.000311 | NM_005044.1:2590    |
| PRLR    | -0.184 | 0.000673 | NM_001204318.1:563  |
| PROM1   | -0.238 | 0.00121  | NM_006017.1:925     |
| PTTG2   | -0.127 | 0.000152 | NM_006607.2:5       |
| RAD50   | 0.147  | 0.00924  | NM_005732.2:5397    |
| RAF1    | 0.0629 | 0.00789  | NM_002880.2:1990    |
| RELA    | -0.16  | 0.00378  | NM_021975.3:1990    |
| RELN    | 0.222  | 0.000153 | NM_005045.2:345     |
| RHOA    | -0.212 | 0.00033  | NM_001664.2:1230    |
| RUNX1   | 0.416  | 0.0044   | NM_001754.4:635     |
| SETD2   | 0.188  | 0.000112 | NM_014159.6:6160    |
| SHC2    | 0.331  | 0.001    | NM_012435.2:698     |
| SMAD2   | 0.145  | 0.000271 | NM_001003652.1:4500 |
| SMAD4   | 0.0814 | 0.00388  | NM_005359.3:1370    |
| SMARCB1 | -0.118 | 0.0036   | NM_003073.3:1060    |
| SOCS1   | -0.389 | 2.06E-05 | NM_003745.1:1025    |
| SPRY1   | -0.434 | 0.000495 | NM_005841.1:810     |
| SPRY2   | -0.107 | 0.00232  | NM_005842.2:85      |
| STK11   | -0.2   | 0.00263  | NM_000455.4:2060    |
| TBL1XR1 | 0.0898 | 0.00555  | NM_024665.4:915     |
| TCF7L1  | 0.3    | 0.00317  | NM_031283.1:2215    |
| TFDP1   | -0.134 | 0.000719 | NM_007111.4:1826    |
| TGFB1   | -0.361 | 0.00153  | NM_000660.3:1260    |
| TGFBR2  | -0.121 | 0.000536 | NM_001024847.1:1760 |
| THBS4   | 0.25   | 0.0078   | NM_003248.3:985     |
| TNFAIP3 | 0.488  | 9.29E-05 | NM_006290.2:260     |
| TP53    | -0.154 | 0.000392 | NM_000546.2:1330    |
| TSC1    | 0.322  | 0.00115  | NM_000368.3:100     |
| UBE2T   | 0.0624 | 0.00199  | NM_014176.3:595     |
| VEGFA   | 0.266  | 0.000124 | NM_001025366.1:1325 |
| WIF1    | 0.883  | 3.42E-05 | NM_007191.2:765     |
| XRCC4   | 0.209  | 0.000844 | NM_003401.3:772     |

**Cell line: Mahlavu**

| Gene name | Log2 fold change | P-value  | probe.ID           |
|-----------|------------------|----------|--------------------|
| ABL1      | 0.196            | 0.000142 | NM_005157.3:3200   |
| ALKBH2    | 0.23             | 0.00364  | NM_001001655.2:907 |
| ALKBH3    | 0.0718           | 0.00275  | NM_139178.3:690    |
| ANGPT1    | 0.183            | 0.00135  | NM_001146.3:2080   |
| APC       | -0.24            | 0.000634 | NM_000038.3:6850   |
| ARID1A    | -0.284           | 0.00124  | NM_006015.4:5495   |
| ARID2     | -0.0882          | 0.0102   | NM_152641.2:3355   |
| ASXL1     | -0.0805          | 0.000481 | NM_001164603.1:472 |
| ATR       | -0.248           | 0.00643  | NM_001184.2:565    |
| B2M       | 0.169            | 0.0046   | NM_004048.2:25     |

| Gene name | Log2 fold change | P-value  | probe.ID            |
|-----------|------------------|----------|---------------------|
| LAMB3     | 0.343            | 0.00263  | NM_000228.2:695     |
| LEF1      | 0.118            | 0.00617  | NM_016269.3:1165    |
| LEPR      | -0.397           | 0.000642 | NM_001003679.1:2000 |
| LIF       | 0.779            | 0.00119  | NM_002309.3:1240    |
| LTBP1     | 0.593            | 0.000799 | NM_000627.3:4124    |
| MAD2L2    | -0.0859          | 0.00528  | NM_001127325.1:290  |
| MAML2     | 0.227            | 0.00547  | NM_032427.1:4125    |
| MAP2K1    | 0.216            | 0.00127  | NM_002755.2:970     |
| MAP2K4    | -0.247           | 0.000241 | NM_003010.2:2830    |
| MAP2K6    | -0.287           | 0.000167 | NM_002758.3:555     |

|          |         |          |                     |
|----------|---------|----------|---------------------|
| BAP1     | -0.0531 | 0.00866  | NM_004656.2:240     |
| BCL2L1   | 0.0837  | 0.00122  | NM_138578.1:1560    |
| BNIP3    | 0.409   | 4.03E-06 | NM_004052.2:325     |
| BRAF     | -0.123  | 0.00297  | NM_004333.3:565     |
| BRCA1    | 0.186   | 0.00578  | NM_007305.2:1275    |
| BRCA2    | 0.206   | 0.00445  | NM_000059.3:115     |
| BRIP1    | 0.43    | 0.000703 | NM_032043.1:1130    |
| CASP7    | 0.25    | 0.00341  | NM_001227.3:915     |
| CASP8    | 0.0783  | 0.0053   | NM_001228.4:301     |
| CBL      | -0.211  | 0.000837 | NM_005188.2:7485    |
| CCNB1    | -0.132  | 0.000125 | NM_031966.2:715     |
| CCNB3    | -0.0904 | 0.000954 | NM_033671.1:35      |
| CCND1    | 0.452   | 6.21E-05 | NM_053056.2:690     |
| CDC25B   | -0.184  | 7.60E-05 | NM_021873.2:3045    |
| CDC25C   | -0.233  | 0.00309  | NM_001790.2:1055    |
| CDC6     | 0.233   | 0.000373 | NM_001254.3:1300    |
| CDK2     | 0.324   | 0.00183  | NM_001798.2:220     |
| CDK4     | 0.128   | 7.50E-05 | NM_000075.2:1055    |
| CDKN1A   | 0.824   | 1.87E-05 | NM_000389.2:1975    |
| CDKN1B   | -0.24   | 0.000518 | NM_004064.2:365     |
| CDKN2C   | -0.264  | 0.00369  | NM_001262.2:1295    |
| CDKN2D   | -0.234  | 0.000906 | NM_001800.3:870     |
| CHEK2    | 0.121   | 0.00526  | NM_007194.3:140     |
| COL5A1   | 0.0662  | 0.00984  | NM_000093.3:6345    |
| CREB3L1  | -0.113  | 0.000205 | NM_052854.1:195     |
| CTNNB1   | -0.0484 | 0.00303  | NM_001904.3:2265    |
| CYLD     | 0.192   | 3.54E-05 | NM_015247.1:2890    |
| DDB2     | 0.362   | 0.000916 | NM_000107.1:840     |
| DDIT3    | 0.365   | 2.00E-05 | NM_004083.4:40      |
| DDIT4    | 0.564   | 0.000469 | NM_019058.2:85      |
| DUSP4    | 0.813   | 1.73E-05 | NM_057158.2:3115    |
| DUSP5    | 0.486   | 5.60E-06 | NM_004419.3:675     |
| DUSP6    | 0.836   | 0.000328 | NM_001946.2:1535    |
| E2F1     | -0.083  | 0.00364  | NM_005225.1:935     |
| EFNA5    | 0.395   | 0.000258 | NM_001962.2:5035    |
| EGFR     | 0.152   | 0.000696 | NM_201282.1:360     |
| EIF4EBP1 | 0.172   | 8.06E-06 | NM_004095.3:363     |
| ENDOG    | -0.137  | 5.00E-04 | NM_004435.2:694     |
| EP300    | -0.104  | 0.00266  | NM_001429.2:715     |
| EPHA2    | 0.0849  | 0.0104   | NM_004431.2:1525    |
| ERCC6    | 0.0841  | 0.00483  | NM_000124.2:3235    |
| ETS2     | 0.107   | 0.000263 | NM_005239.4:1175    |
| ETV4     | 0.693   | 0.00118  | NM_001079675.1:1535 |
| FANCB    | 0.16    | 0.00506  | NM_152633.2:2470    |
| FANCE    | -0.265  | 0.000251 | NM_021922.2:1275    |
| FANCG    | -0.189  | 0.00447  | NM_004629.1:1900    |
| FAS      | 0.277   | 0.00461  | NM_152876.1:1740    |

|          |         |          |                     |
|----------|---------|----------|---------------------|
| MAP3K1   | -0.0658 | 0.00628  | NM_005921.1:2525    |
| MAPK1    | -0.0858 | 0.00232  | NM_138957.2:430     |
| MAPK12   | -0.45   | 0.000533 | NM_002969.3:425     |
| MAPK8    | 0.096   | 0.00451  | NM_002750.2:945     |
| MCM2     | -0.0885 | 0.00354  | NM_004526.2:2945    |
| MCM5     | -0.254  | 0.00695  | NM_006739.3:1580    |
| MCM7     | 0.0984  | 0.00256  | NM_182776.1:1325    |
| MED12    | -0.67   | 0.000414 | NM_005120.2:375     |
| MET      | 0.0583  | 0.000913 | NM_000245.2:405     |
| MGMT     | 0.149   | 0.00182  | NM_002412.3:323     |
| MLLT3    | -0.553  | 0.00496  | NM_004529.2:1480    |
| MSH6     | -0.17   | 4.64E-05 | NM_000179.1:3525    |
| MUTYH    | -0.41   | 0.000465 | NM_012222.2:412     |
| NBN      | -0.0622 | 0.00497  | NM_001024688.1:1105 |
| NCOR1    | 0.0934  | 0.00145  | NM_006311.3:1390    |
| NF1      | -0.062  | 0.00281  | NM_000267.2:1035    |
| NGF      | 0.411   | 6.58E-05 | NM_002506.2:100     |
| NOG      | -0.182  | 0.00277  | NM_005450.4:1543    |
| NOTCH2   | 0.0875  | 0.00386  | NM_024408.3:2842    |
| NPM1     | -0.216  | 0.00405  | NM_002520.5:10      |
| NRAS     | -0.152  | 1.20E-05 | NM_002524.3:877     |
| NTHL1    | -0.355  | 0.000495 | NM_002528.5:476     |
| NUMBL    | -0.184  | 0.00883  | NM_004756.3:591     |
| NUPR1    | 0.63    | 3.53E-05 | NM_001042483.1:829  |
| PBX1     | -0.437  | 0.000271 | NM_002585.2:368     |
| PDGFC    | 0.146   | 0.00113  | NM_016205.1:10      |
| PIK3CA   | -0.146  | 0.003    | NM_006218.2:2445    |
| PIK3R1   | 0.172   | 0.00185  | NM_181504.2:1105    |
| PIK3R2   | -0.125  | 0.000396 | NM_005027.2:3100    |
| PIM1     | 0.341   | 0.00226  | NM_002648.2:1630    |
| PKMYT1   | -0.135  | 0.00766  | NM_004203.3:780     |
| PLA2G3   | -0.27   | 0.00939  | NM_015715.3:2415    |
| PLA2G4C  | 1.05    | 0.000181 | NM_003706.2:2310    |
| PLAT     | 0.957   | 3.73E-07 | NM_000931.2:1334    |
| PLAU     | -0.0725 | 0.00152  | NM_002658.2:793     |
| PLCB1    | 0.459   | 0.000508 | NM_182734.1:170     |
| PLCE1    | 0.175   | 0.0037   | NM_001165979.1:392  |
| PLD1     | 0.24    | 0.00613  | NM_002662.3:1265    |
| PML      | 0.425   | 9.64E-06 | NM_002675.3:281     |
| POLD4    | 0.172   | 0.00716  | NM_021173.2:470     |
| POLR2H   | 0.31    | 7.13E-05 | NM_001278698.1:940  |
| POLR2J   | -0.385  | 0.00293  | NM_006234.4:618     |
| PPARGC1A | 0.338   | 0.000103 | NM_013261.3:1505    |
| PPP2R1A  | -0.107  | 0.00886  | NM_014225.3:1440    |
| PPP3CA   | -0.175  | 0.00507  | NM_000944.4:3920    |
| PPP3CC   | 0.434   | 0.000341 | NM_005605.3:1460    |
| PRKACA   | -0.102  | 0.000545 | NM_002730.3:400     |



|          |         |          |                    |
|----------|---------|----------|--------------------|
| FBXW7    | -0.136  | 0.00807  | NM_018315.4:1480   |
| FEN1     | 0.13    | 0.000721 | NM_004111.4:425    |
| FGF1     | 0.893   | 4.04E-06 | NM_033137.1:315    |
| FGF2     | -0.105  | 0.000208 | NM_002006.4:620    |
| FGFR1    | -0.177  | 0.000794 | NM_015850.2:1335   |
| FN1      | 0.436   | 8.99E-08 | NM_212482.1:1776   |
| FOS      | 1.17    | 9.84E-07 | NM_005252.2:1475   |
| FOSL1    | 0.187   | 0.000545 | NM_005438.2:280    |
| FST      | 0.605   | 0.00129  | NM_006350.2:575    |
| FUBP1    | -0.298  | 6.65E-05 | NM_003902.3:820    |
| FUT8     | 0.138   | 0.00723  | NM_004480.4:2841   |
| FZD2     | -0.445  | 8.59E-06 | NM_001466.2:845    |
| FZD7     | 0.427   | 0.000902 | NM_003507.1:1890   |
| GADD45A  | 0.356   | 4.54E-09 | NM_001924.2:865    |
| GATA2    | 0.313   | 0.000546 | NM_032638.3:1495   |
| GNA11    | -0.0539 | 0.00818  | NM_002067.1:555    |
| GNAS     | 0.0315  | 0.000164 | NM_080425.1:1910   |
| GRB2     | -0.0778 | 0.00643  | NM_002086.4:412    |
| H3F3A    | -0.114  | 6.11E-05 | NM_002107.3:190    |
| H3F3C    | 0.0729  | 0.00462  | NM_001013699.2:829 |
| HDAC1    | -0.0938 | 0.0031   | NM_004964.2:785    |
| HDAC10   | -0.414  | 0.00185  | NM_032019.5:932    |
| HDAC5    | -0.155  | 0.00673  | NM_005474.4:3160   |
| HDAC6    | -0.106  | 0.00736  | NM_006044.2:536    |
| HES1     | 0.573   | 2.50E-05 | NM_005524.2:860    |
| HIST1H3B | -0.36   | 1.10E-05 | NM_003537.3:335    |
| HIST1H3H | -0.768  | 5.07E-07 | NM_003536.2:355    |
| HOXA10   | -0.167  | 0.00323  | NM_018951.3:1503   |
| HSP90B1  | -0.232  | 7.47E-06 | NM_003299.1:160    |
| HSPA1A   | -0.627  | 0.00078  | NM_005345.5:98     |
| HSPB1    | -0.297  | 2.80E-07 | NM_001540.3:374    |
| ID1      | -0.329  | 0.00199  | NM_002165.2:345    |
| ID2      | -0.293  | 0.000322 | NM_002166.4:505    |
| IDH1     | 0.372   | 0.000114 | NM_005896.2:105    |
| IDH2     | 0.296   | 0.000212 | NM_002168.2:944    |
| IGFBP3   | -0.13   | 0.00114  | NM_000598.4:1255   |
| IL1RAP   | 0.227   | 0.00317  | NM_002182.2:460    |
| IL6      | 0.942   | 2.98E-05 | NM_000600.1:220    |
| IL6R     | 0.113   | 0.00351  | NM_000565.2:993    |
| IL7R     | 0.278   | 8.56E-05 | NM_002185.2:1610   |
| IRAK2    | 0.368   | 0.00105  | NM_001570.3:1285   |
| ITGA2    | -0.213  | 0.000358 | NM_002203.2:475    |
| ITGB3    | 0.838   | 1.70E-06 | NM_000212.2:4485   |
| JAG2     | -0.291  | 0.000984 | NM_145159.1:4225   |
| JAK1     | -0.186  | 0.00128  | NM_002227.1:285    |
| JUN      | 0.457   | 2.58E-06 | NM_002228.3:140    |
| KAT2B    | 0.169   | 0.00135  | NM_003884.3:1220   |

|           |         |          |                     |
|-----------|---------|----------|---------------------|
| PRKAR1B   | 0.234   | 0.000221 | NM_001164759.1:1112 |
| PRKAR2B   | -0.205  | 0.00885  | NM_002736.2:1350    |
| PTPN11    | 0.209   | 3.37E-06 | NM_002834.3:1480    |
| PTPRR     | 0.377   | 0.000247 | NM_001207015.1:1652 |
| PTTG2     | -0.1    | 0.000445 | NM_006607.2:5       |
| RAD21     | -0.112  | 3.10E-05 | NM_006265.2:1080    |
| RAD50     | 0.349   | 5.04E-07 | NM_005732.2:5397    |
| RB1       | -0.0768 | 0.0012   | NM_000321.1:2110    |
| RFC3      | 0.0397  | 0.0093   | NM_002915.3:740     |
| RHOA      | -0.142  | 0.000195 | NM_001664.2:1230    |
| RPS6KA5   | 0.452   | 2.72E-05 | NM_004755.2:855     |
| RUNX1     | -0.247  | 0.000278 | NM_001754.4:635     |
| SETD2     | -0.182  | 0.00134  | NM_014159.6:6160    |
| SF3B1     | -0.0852 | 0.000348 | NM_001005526.1:0    |
| SIN3A     | -0.397  | 0.000405 | NM_015477.1:1605    |
| SKP1      | -0.11   | 2.50E-05 | NM_170679.2:630     |
| SMAD2     | -0.143  | 0.000164 | NM_001003652.1:4500 |
| SMAD4     | 0.186   | 0.00874  | NM_005359.3:1370    |
| SMARCA4   | -0.153  | 0.000294 | NM_003072.3:5400    |
| SMARCB1   | -0.202  | 3.73E-06 | NM_003073.3:1060    |
| SOCS1     | 0.784   | 1.49E-05 | NM_003745.1:1025    |
| SOS1      | -0.109  | 0.00599  | NM_005633.2:1635    |
| SOS2      | 0.314   | 0.000529 | NM_006939.2:3845    |
| SPRY2     | 0.337   | 0.00054  | NM_005842.2:85      |
| SPRY4     | 0.346   | 0.0064   | NM_030964.3:1900    |
| SRSF2     | -0.202  | 0.00094  | NM_003016.3:312     |
| STAG2     | -0.153  | 0.000859 | NM_001042749.1:4040 |
| STAT1     | 0.566   | 8.49E-06 | NM_007315.2:205     |
| STK11     | -0.146  | 0.000781 | NM_000455.4:2060    |
| STMN1     | -0.175  | 0.00217  | NM_203401.1:478     |
| SUV39H2   | -0.175  | 0.00179  | NM_024670.3:2035    |
| TGFB1     | -0.219  | 1.51E-05 | NM_000660.3:1260    |
| TGFB2     | 0.274   | 2.37E-05 | NM_003238.2:1125    |
| TGFBF2    | 0.224   | 0.000309 | NM_001024847.1:1760 |
| TIAM1     | 0.831   | 0.00205  | NM_003253.2:5620    |
| TLR4      | 0.531   | 0.00021  | NM_138554.2:2570    |
| TNC       | 0.235   | 0.000118 | NM_002160.3:4       |
| TNFAIP3   | 0.709   | 0.00011  | NM_006290.2:260     |
| TNFRSF10B | 0.436   | 4.46E-06 | NM_003842.3:565     |
| TNFRSF10D | -0.45   | 0.00692  | NM_003840.3:2380    |
| TP53      | -0.102  | 0.00227  | NM_000546.2:1330    |
| TSC1      | 0.243   | 0.00108  | NM_000368.3:100     |
| TSLP      | 0.542   | 0.000111 | NM_033035.4:899     |
| TTK       | -0.138  | 0.0022   | NM_003318.3:1200    |
| UBE2T     | 0.12    | 0.00239  | NM_014176.3:595     |
| VEGFA     | 0.622   | 4.65E-06 | NM_001025366.1:1325 |
| VHL       | 0.121   | 9.16E-06 | NM_000551.2:1280    |

|       |        |          |                  |
|-------|--------|----------|------------------|
| KDM6A | 0.195  | 0.00201  | NM_021140.2:2590 |
| KITLG | 0.313  | 0.000525 | NM_003994.4:1155 |
| KLF4  | 0.608  | 4.89E-06 | NM_004235.4:1980 |
| LAMA1 | 0.212  | 0.000991 | NM_005559.2:5230 |
| LAMA3 | 0.319  | 9.68E-05 | NM_000227.3:4260 |
| LAMA5 | -0.413 | 0.01     | NM_005560.3:787  |

|      |        |          |                  |
|------|--------|----------|------------------|
| WEE1 | 0.155  | 0.000653 | NM_003390.3:1225 |
| WT1  | -0.449 | 0.00213  | NM_000378.3:2160 |
| XPA  | -0.182 | 0.000662 | NM_000380.3:265  |
| ZAK  | -0.13  | 0.00181  | NM_016653.2:995  |
| ZIC2 | 0.447  | 0.000131 | NM_007129.2:1849 |

**Table S3.** Significantly enriched KEGG signalling pathways of chloroquine phosphate treated liver cells (Huh7 and Mahlavu). Only the pathways that are reported to be enriched in both Enrichr (9) and Webgestalt (10) analysis are given. Significance values and scores are obtained from Enrichr.

| Cell-line                              | Term                                 | Odds Ratio | Combined Score | P-value  | Adjusted P-value |
|----------------------------------------|--------------------------------------|------------|----------------|----------|------------------|
| Huh7                                   | PI3K-Akt signaling pathway           | 15.611     | 1352.847       | 2.31E-38 | 3.56E-36         |
|                                        | MAPK signaling pathway               | 15.165     | 1040.176       | 1.63E-30 | 1.67E-28         |
|                                        | Cell cycle                           | 26.528     | 1718.160       | 7.44E-29 | 5.73E-27         |
|                                        | Ras signaling pathway                | 14.179     | 687.902        | 8.50E-22 | 2.01E-20         |
|                                        | Apoptosis                            | 17.483     | 716.143        | 1.62E-18 | 2.77E-17         |
|                                        | FoxO signaling pathway               | 16.946     | 613.216        | 1.92E-16 | 2.47E-15         |
|                                        | TGF-beta signaling pathway           | 19.006     | 559.205        | 1.67E-13 | 1.83E-12         |
|                                        | Th17 cell differentiation            | 15.986     | 433.755        | 1.65E-12 | 1.54E-11         |
|                                        | p53 signaling pathway                | 20.102     | 516.678        | 6.88E-12 | 5.05E-11         |
|                                        | Longevity regulating pathway         | 15.480     | 383.006        | 1.80E-11 | 1.18E-10         |
|                                        | TNF signaling pathway                | 14.354     | 342.161        | 4.44E-11 | 2.74E-10         |
|                                        | T cell receptor signaling pathway    | 14.330     | 314.235        | 3.00E-10 | 1.74E-09         |
|                                        | Gap junction                         | 14.952     | 305.973        | 1.30E-09 | 7.01E-09         |
|                                        | Toll-like receptor signaling pathway | 8.856      | 98.595         | 1.46E-05 | 4.33E-05         |
|                                        | cGMP-PKG signaling pathway           | 6.341      | 64.137         | 4.05E-05 | 1.13E-04         |
| Cytokine-cytokine receptor interaction | 3.580                                | 22.484     | 0.002          | 0.004    |                  |
| Mahlavu                                | MAPK signaling pathway               | 14.860     | 1427.261       | 1.93E-42 | 2.97E-40         |
|                                        | PI3K-Akt signaling pathway           | 12.641     | 1137.673       | 8.20E-40 | 6.31E-38         |
|                                        | Ras signaling pathway                | 13.384     | 855.224        | 1.77E-28 | 2.73E-27         |
|                                        | Focal adhesion                       | 11.932     | 547.317        | 1.20E-20 | 1.09E-19         |
|                                        | JAK-STAT signaling pathway           | 12.402     | 493.162        | 5.38E-18 | 3.60E-17         |
|                                        | TNF signaling pathway                | 15.774     | 617.099        | 1.02E-17 | 6.71E-17         |
|                                        | Apoptosis                            | 12.134     | 413.198        | 1.63E-15 | 9.10E-15         |
|                                        | HIF-1 signaling pathway              | 14.612     | 465.393        | 1.47E-14 | 7.43E-14         |
|                                        | TGF-beta signaling pathway           | 15.221     | 465.149        | 5.34E-14 | 2.49E-13         |
|                                        | Toll-like receptor signaling pathway | 13.172     | 373.438        | 4.87E-13 | 2.14E-12         |
|                                        | Oxytocin signaling pathway           | 8.953      | 203.071        | 1.41E-10 | 5.30E-10         |
|                                        | Cholinergic synapse                  | 8.969      | 152.336        | 4.21E-08 | 1.32E-07         |
|                                        | IL-17 signaling pathway              | 9.820      | 161.257        | 7.38E-08 | 2.25E-07         |
|                                        | NOD-like receptor signaling pathway  | 6.670      | 108.520        | 8.59E-08 | 2.59E-07         |
|                                        | Necroptosis                          | 5.637      | 63.755         | 1.23E-05 | 3.07E-05         |
|                                        | Circadian entrainment                | 5.649      | 41.080         | 0.001    | 0.001            |
|                                        | Renin secretion                      | 6.618      | 46.006         | 0.001    | 0.002            |
|                                        | Endocytosis                          | 2.994      | 15.531         | 0.006    | 0.011            |

**Table S4.** The list of 36 genes/proteins shared between the CROsBAR COVID-19 knowledge graph and the differentially expressed genes of the chloroquine phosphate treated liver cells (Huh7 and Mahlavu cell-lines) found using the NanoString platform.

| Gene name | Protein accession | Protein name                                                  |
|-----------|-------------------|---------------------------------------------------------------|
| ATR       | Q13535            | Serine/threonine-protein kinase ATR                           |
| B2M       | P61769            | Beta-2-microglobulin                                          |
| BAP1      | Q92560            | Ubiquitin carboxyl-terminal hydrolase BAP1                    |
| BCL2L1    | Q07817            | Bcl-2-like protein 1                                          |
| CCNB1     | P14635            | G2/mitotic-specific cyclin-B1                                 |
| CCND1     | P24385            | G1/S-specific cyclin-D1                                       |
| CDK4      | P11802            | Cyclin-dependent kinase 4                                     |
| CDKN1B    | P46527            | Cyclin-dependent kinase inhibitor 1B                          |
| CHEK2     | O96017            | Serine/threonine-protein kinase Chk2                          |
| CUL1      | Q13616            | Cullin-1                                                      |
| DNMT1     | P26358            | DNA (cytosine-5)-methyltransferase 1                          |
| EGFR      | P00533            | Epidermal growth factor receptor                              |
| EP300     | Q09472            | Histone acetyltransferase p300                                |
| FN1       | P02751            | Fibronectin                                                   |
| HSPA1A    | P0DMV8            | Heat shock 70 kDa protein 1A                                  |
| IKBKG     | Q9Y6K9            | NF-kappa-B essential modulator                                |
| IL6       | P05231            | Interleukin-6                                                 |
| IL6R      | P08887            | Interleukin-6 receptor subunit alpha                          |
| JUN       | P05412            | Transcription factor AP-1                                     |
| LIF       | P15018            | Leukemia inhibitory factor                                    |
| MNAT1     | P51948            | CDK-activating kinase assembly factor MAT1                    |
| NPM1      | P06748            | Nucleophosmin                                                 |
| PLAT      | P00750            | Tissue-type plasminogen activator                             |
| PRKACA    | P17612            | cAMP-dependent protein kinase catalytic subunit alpha         |
| PRKAR2B   | P31323            | cAMP-dependent protein kinase type II-beta regulatory subunit |
| RB1       | P06400            | Retinoblastoma-associated protein                             |
| RHOA      | P61586            | Transforming protein RhoA                                     |
| RUNX1     | Q01196            | Runt-related transcription factor 1                           |
| SMAD4     | Q13485            | Mothers against decapentaplegic homolog 4                     |
| STAT1     | P42224            | Signal transducer and activator of transcription 1-alpha/beta |
| TGFBR2    | P37173            | TGF-beta receptor type-2                                      |
| TIAM1     | Q13009            | T-lymphoma invasion and metastasis-inducing protein 1         |
| TP53      | P04637            | Cellular tumor antigen p53                                    |
| VEGFA     | P15692            | Vascular endothelial growth factor A                          |
| VHL       | P40337            | von Hippel-Lindau disease tumor suppressor                    |
| XPA       | P23025            | DNA repair protein complementing XP-A cells                   |

**Table S5.** CROssBAR COVID-19 large-scale and simplified knowledge graphs node and edge statistics.

| Large-scale COVID-19 KG               |             | Simplified COVID-19 KG                |             |
|---------------------------------------|-------------|---------------------------------------|-------------|
| Node Type                             | Node Stats  | Node_Type                             | Node Stats  |
| Human genes/proteins                  | 746         | Human genes/proteins                  | 63          |
| SARS-CoV-1 genes/proteins             | 15          | SARS-CoV-1 genes/proteins             | 15          |
| SARS-CoV-2 genes/proteins             | 17          | SARS-CoV-2 genes/proteins             | 17          |
| Drugs                                 | 158         | Drugs                                 | 140         |
| Compounds                             | 167         | Compounds                             | 92          |
| KEGG Pathways                         | 32          | KEGG Pathways                         | 22          |
| Reactome Pathways                     | 68          | Reactome Pathways                     | 43          |
| Phenotype terms (HPO)                 | 43          | Phenotype terms (HPO)                 | 27          |
| KEGG Diseases                         | 19          | KEGG Diseases                         | 4           |
| EFO Diseases                          | 22          | EFO Diseases                          | 9           |
| Organism                              | 2           | Organism                              | 3           |
| <b>TOTAL</b>                          | <b>1289</b> | <b>TOTAL</b>                          | <b>435</b>  |
| Edge Type                             | Edge Stats  | Edge_Type                             | Edge Stats  |
| PPIs                                  | 1674        | PPIs                                  | 166         |
| Approved/investigational DTIs*        | 120         | Approved/investigational DTIs         | 36          |
| Bioassay-based exp. DTIs (ChEMBL)     | 382         | Bioassay-based exp. DTIs (ChEMBL)     | 147         |
| Predicted DTIs                        | 508         | Predicted DTIs                        | 16          |
| Gene/protein-KEGG Pathway assoc.**    | 557         | Gene/protein-KEGG Pathway assoc.      | 119         |
| Gene/protein-Reactome Pathway assoc.  | 776         | Gene/protein-Reactome Pathway assoc.  | 150         |
| Gene/protein-KEGG Disease assoc.      | 67          | Gene/protein-KEGG Disease assoc.      | 9           |
| Gene/protein-EFO Disease assoc.       | 53          | Gene/protein-EFO Disease assoc.       | 14          |
| Gene/protein-HPO assoc.               | 2427        | Gene/protein-HPO assoc.               | 188         |
| HPO-EFO Disease assoc.                | 56          | HPO-EFO Disease assoc.                | 41          |
| Drug-KEGG Disease Indications         | 14          | Drug-KEGG Disease Indications         | 2           |
| Drug-COVID-19 Disease Indications     | 62          | Drug-COVID-19 Disease Indications     | 62          |
| KEGG Pathway-Disease modulations      | 3           | KEGG Pathway-Disease modulations      | 4           |
| Orthology relations between SARS-CoVs | 12          | Orthology relations between SARS-CoVs | 12          |
| Organism-gene/protein relations       | 32          | Organism-gene/protein relations       | 95          |
| <b>TOTAL</b>                          | <b>6743</b> | <b>TOTAL</b>                          | <b>1061</b> |

\*DTIs: drug/compound-target interactions, \*\*assoc.: associations

**Table S6.** Literature based information for new potential COVID-19 based repurposing of CROssBAR COVID-19 knowledge graph drugs.

| Drug Name                 | DrugBank id | Description                                                | Prediction Source *                                     | Clinical trial Id | Current state **                                 |
|---------------------------|-------------|------------------------------------------------------------|---------------------------------------------------------|-------------------|--------------------------------------------------|
| Cyclosporine              | DB00091     | calcineurin inhibitor                                      | Enrichment (DrugBank/ ChEMBL) & Prediction (DEEPScreen) | NCT04392531       | Phase 4                                          |
| Interferon beta-1a        | DB00060     | immunomodulator                                            | Enrichment (DrugBank)                                   | NCT02735707       | Phase 4                                          |
| Tocilizumab               | DB06273     | IL-6 inhibitor                                             | Enrichment (DrugBank)                                   | NCT04377750       | Phase 4                                          |
| Tenecteplase              | DB00031     | fibrin-specific tissue-plasminogen activator               | Enrichment (DrugBank)                                   | NCT04558125       | Phase 4                                          |
| Ascorbic acid (Vitamin C) | DB00126     | water-soluble vitamin                                      | Enrichment (DrugBank) & Prediction (DEEPScreen)         | NCT04401150       | Phase 3                                          |
| Ixekizumab                | DB11569     | IL-17A inhibitor                                           | Enrichment (DrugBank)                                   | NCT04724629       | Phase 3                                          |
| Epigallocatechin gallate  | DB12116     | phenolic antioxidant                                       | Enrichment (ChEMBL) & Prediction (DEEPScreen)           | NCT04446065       | Phase 2-3                                        |
| Vazegepant                | DB15688     | calcitonin gene-related peptide (CGRP) receptor antagonist | Prediction (DEEPScreen)                                 | NCT04346615       | Phase 2-3                                        |
| Simvastatin               | DB00641     | HMG-CoA reductase inhibitor                                | Enrichment (DrugBank) & Prediction (DEEPScreen)         | NCT04348695       | Phase 2                                          |
| Amlodipine                | DB00381     | calcium channel blocker                                    | Prediction (MDeePred / DEEPScreen)                      | -                 | <i>in vitro</i> & <i>in vivo</i> studies (1,2)   |
| Lifitegrast               | DB11611     | integrin antagonist                                        | Enrichment (DrugBank)                                   | -                 | <i>In silico</i> & <i>in vitro</i> studies (4,5) |
| Arteminol                 | DB11638     | artemisinin derivative and antimalarial agent              | Enrichment (DrugBank) & Prediction (DEEPScreen)         | -                 | <i>In silico</i> study (3)                       |
| Becatecarin               | DB06362     | diethylaminoethyl analogue of rebeccamycin                 | Prediction (MDeePred / DEEPScreen)                      | -                 | <i>In silico</i> study (7)                       |
| Amcinonide                | DB00288     | corticosteroid                                             | Prediction (MDeePred)                                   | -                 | <i>In silico</i> study (6)                       |
| Rocaglamide               | DB15495     | eIF4A inhibitor                                            | Enrichment (DrugBank) & Prediction (DEEPScreen)         | -                 | -                                                |
| Didesmethyl rocaglamide   | DB15496     | eIF4A inhibitor                                            | Enrichment (DrugBank)                                   | -                 | -                                                |

\* The source of the drug prediction as either enrichment analysis or DL prediction (prediction of our deep learning-based tools).

\*\* Some of these drugs have multiple clinical trials concerning COVID-19. In these cases, the one with the latest phase is given.

**Table S7.** Statistics regarding the presence of 140 selected highly connected/hub terms in 1365 CROssBAR knowledge graphs constructed with random term queries, including expected and observed frequencies, and Fisher's exact test significance values.

| Biological comp. type | Term id       | Term name                                                   | $g_D^*$ | $G^*$ | $M_D^*$ | $M_{sum}^*$ | $t^*$ | Observed frequency ( $g_D/G$ ) | Expected frequency ( $t^*M_D/M_{sum}$ ) | Fisher's exact test p-value | Is observed frequency significantly lower? |
|-----------------------|---------------|-------------------------------------------------------------|---------|-------|---------|-------------|-------|--------------------------------|-----------------------------------------|-----------------------------|--------------------------------------------|
| KEGG Pathway          | hsa04151      | PI3K-Akt signaling pathway                                  | 137     | 1365  | 354     | 21440       | 8.65  | 0.1004                         | 0.1428                                  | 6.43E-06                    | Yes                                        |
| KEGG Pathway          | hsa04080      | Neuroactive ligand-receptor interaction                     | 168     | 1365  | 342     | 21440       | 8.65  | 0.1231                         | 0.1380                                  | 1.33E-01                    | No                                         |
| KEGG Pathway          | hsa04010      | MAPK signaling pathway                                      | 125     | 1365  | 296     | 21440       | 8.65  | 0.0916                         | 0.1194                                  | 1.79E-03                    | Yes                                        |
| KEGG Pathway          | hsa04060      | Cytokine-cytokine receptor interaction                      | 57      | 1365  | 296     | 21440       | 8.65  | 0.0418                         | 0.1194                                  | 1.74E-22                    | Yes                                        |
| KEGG Pathway          | hsa04144      | Endocytosis                                                 | 65      | 1365  | 250     | 21440       | 8.65  | 0.0476                         | 0.1008                                  | 3.38E-12                    | Yes                                        |
| KEGG Pathway          | hsa04014      | Ras signaling pathway                                       | 92      | 1365  | 236     | 21440       | 8.65  | 0.0674                         | 0.0952                                  | 4.55E-04                    | Yes                                        |
| KEGG Pathway          | hsa04024      | cAMP signaling pathway                                      | 82      | 1365  | 223     | 21440       | 8.65  | 0.0601                         | 0.0900                                  | 9.65E-05                    | Yes                                        |
| KEGG Pathway          | hsa04015      | Rap1 signaling pathway                                      | 102     | 1365  | 217     | 21440       | 8.65  | 0.0747                         | 0.0875                                  | 1.12E-01                    | No                                         |
| KEGG Pathway          | hsa04810      | Regulation of actin cytoskeleton                            | 88      | 1365  | 213     | 21440       | 8.65  | 0.0645                         | 0.0859                                  | 4.94E-03                    | Yes                                        |
| KEGG Pathway          | hsa04020      | Calcium signaling pathway                                   | 94      | 1365  | 199     | 21440       | 8.65  | 0.0689                         | 0.0803                                  | 1.35E-01                    | No                                         |
| KEGG Pathway          | hsa04510      | Focal adhesion                                              | 113     | 1365  | 199     | 21440       | 8.65  | 0.0828                         | 0.0803                                  | 7.20E-01                    | No                                         |
| KEGG Pathway          | hsa04621      | NOD-like receptor signaling pathway                         | 51      | 1365  | 181     | 21440       | 8.65  | 0.0374                         | 0.0730                                  | 1.11E-07                    | Yes                                        |
| KEGG Pathway          | hsa04022      | cGMP-PKG signaling pathway                                  | 64      | 1365  | 173     | 21440       | 8.65  | 0.0469                         | 0.0698                                  | 8.81E-04                    | Yes                                        |
| KEGG Pathway          | hsa04218      | Cellular senescence                                         | 60      | 1365  | 166     | 21440       | 8.65  | 0.0440                         | 0.0670                                  | 5.67E-04                    | Yes                                        |
| KEGG Pathway          | hsa04630      | JAK-STAT signaling pathway                                  | 47      | 1365  | 163     | 21440       | 8.65  | 0.0344                         | 0.0658                                  | 1.07E-06                    | Yes                                        |
| KEGG Pathway          | hsa04310      | Wnt signaling pathway                                       | 61      | 1365  | 159     | 21440       | 8.65  | 0.0447                         | 0.0641                                  | 3.33E-03                    | Yes                                        |
| KEGG Pathway          | hsa04390      | Hippo signaling pathway                                     | 85      | 1365  | 157     | 21440       | 8.65  | 0.0623                         | 0.0633                                  | 9.54E-01                    | No                                         |
| KEGG Pathway          | hsa04150      | mTOR signaling pathway                                      | 57      | 1365  | 155     | 21440       | 8.65  | 0.0418                         | 0.0625                                  | 1.35E-03                    | Yes                                        |
| KEGG Pathway          | hsa04210      | Apoptosis                                                   | 70      | 1365  | 139     | 21440       | 8.65  | 0.0513                         | 0.0561                                  | 5.03E-01                    | No                                         |
| KEGG Pathway          | hsa04068      | FoxO signaling pathway                                      | 73      | 1365  | 130     | 21440       | 8.65  | 0.0535                         | 0.0524                                  | 8.51E-01                    | No                                         |
| Reactome Pathway      | R-HSA-6798695 | Neutrophil degranulation                                    | 41      | 1365  | 478     | 79623       | 9.26  | 0.0300                         | 0.0556                                  | 1.17E-05                    | Yes                                        |
| Reactome Pathway      | R-HSA-381753  | Olfactory Signaling Pathway                                 | 0       | 1365  | 432     | 79623       | 9.26  | 0.0000                         | 0.0502                                  | 1.12E-30                    | Yes                                        |
| Reactome Pathway      | R-HSA-212436  | Generic Transcription Pathway                               | 14      | 1365  | 358     | 79623       | 9.26  | 0.0103                         | 0.0416                                  | 1.37E-11                    | Yes                                        |
| Reactome Pathway      | R-HSA-983168  | Antigen processing: Ubiquitination & Proteasome degradation | 19      | 1365  | 309     | 79623       | 9.26  | 0.0139                         | 0.0359                                  | 1.38E-06                    | Yes                                        |
| Reactome Pathway      | R-HSA-418594  | G alpha (i) signalling events                               | 49      | 1365  | 264     | 79623       | 9.26  | 0.0359                         | 0.0307                                  | 2.68E-01                    | No                                         |
| Reactome Pathway      | R-HSA-8951664 | Neddylation                                                 | 8       | 1365  | 235     | 79623       | 9.26  | 0.0059                         | 0.0273                                  | 1.56E-08                    | Yes                                        |

|                  |                 |                                                                                                                             |    |      |     |       |      |        |        |          |     |
|------------------|-----------------|-----------------------------------------------------------------------------------------------------------------------------|----|------|-----|-------|------|--------|--------|----------|-----|
| Reactome Pathway | R-HSA-5689880   | Ub-specific processing proteases                                                                                            | 6  | 1365 | 205 | 79623 | 9.26 | 0.0044 | 0.0238 | 2.39E-08 | Yes |
| Reactome Pathway | R-HSA-198933    | Immunoregulatory interactions between a Lymphoid and a non-Lymphoid cell                                                    | 7  | 1365 | 201 | 79623 | 9.26 | 0.0051 | 0.0234 | 2.32E-07 | Yes |
| Reactome Pathway | R-HSA-2467813   | Separation of Sister Chromatids                                                                                             | 6  | 1365 | 190 | 79623 | 9.26 | 0.0044 | 0.0221 | 1.79E-07 | Yes |
| Reactome Pathway | R-HSA-72163     | mRNA Splicing - Major Pathway                                                                                               | 18 | 1365 | 180 | 79623 | 9.26 | 0.0132 | 0.0209 | 4.44E-02 | Yes |
| Reactome Pathway | R-HSA-9010553   | Regulation of expression of SLITs and ROBOs                                                                                 | 3  | 1365 | 172 | 79623 | 9.26 | 0.0022 | 0.0200 | 1.02E-08 | Yes |
| Reactome Pathway | R-HSA-6805567   | Keratinization                                                                                                              | 31 | 1365 | 155 | 79623 | 9.26 | 0.0227 | 0.0180 | 2.17E-01 | No  |
| Reactome Pathway | R-HSA-202733    | Cell surface interactions at the vascular wall                                                                              | 15 | 1365 | 151 | 79623 | 9.26 | 0.0110 | 0.0176 | 7.50E-02 | No  |
| Reactome Pathway | R-HSA-2871837   | FCERI mediated NF- $\kappa$ B activation                                                                                    | 0  | 1365 | 142 | 79623 | 9.26 | 0.0000 | 0.0165 | 3.48E-10 | Yes |
| Reactome Pathway | R-HSA-194840    | Rho GTPase cycle                                                                                                            | 3  | 1365 | 140 | 79623 | 9.26 | 0.0022 | 0.0163 | 1.05E-06 | Yes |
| Reactome Pathway | R-HSA-114608    | Platelet degranulation                                                                                                      | 5  | 1365 | 128 | 79623 | 9.26 | 0.0037 | 0.0149 | 9.82E-05 | Yes |
| Reactome Pathway | R-HSA-381426    | Regulation of Insulin-like Growth Factor (IGF) transport and uptake by Insulin-like Growth Factor Binding Proteins (IGFBPs) | 12 | 1365 | 124 | 79623 | 9.26 | 0.0088 | 0.0144 | 8.47E-02 | No  |
| Reactome Pathway | R-HSA-6785807   | Interleukin-4 and Interleukin-13 signaling                                                                                  | 14 | 1365 | 111 | 79623 | 9.26 | 0.0103 | 0.0129 | 4.67E-01 | No  |
| Reactome Pathway | R-HSA-202424    | Downstream TCR signaling                                                                                                    | 6  | 1365 | 104 | 79623 | 9.26 | 0.0044 | 0.0121 | 5.43E-03 | Yes |
| Reactome Pathway | R-HSA-5620912   | Anchoring of the basal body to the plasma membrane                                                                          | 12 | 1365 | 97  | 79623 | 9.26 | 0.0088 | 0.0113 | 5.15E-01 | No  |
| EFO Disease      | Orphanet: 791   | Retinitis pigmentosa                                                                                                        | 17 | 1365 | 76  | 6798  | 7.48 | 0.0125 | 0.0837 | 1.37E-27 | Yes |
| EFO Disease      | Orphanet: 90636 | Autosomal recessive non-syndromic sensorineural deafness type DFNB                                                          | 17 | 1365 | 63  | 6798  | 7.48 | 0.0125 | 0.0693 | 8.09E-21 | Yes |
| EFO Disease      | Orphanet: 1934  | Early infantile epileptic encephalopathy                                                                                    | 26 | 1365 | 50  | 6798  | 7.48 | 0.0190 | 0.0550 | 9.22E-10 | Yes |
| EFO Disease      | Orphanet: 154   | Familial isolated dilated cardiomyopathy                                                                                    | 10 | 1365 | 34  | 6798  | 7.48 | 0.0073 | 0.0374 | 4.66E-11 | Yes |
| EFO Disease      | Orphanet: 244   | Primary ciliary dyskinesia                                                                                                  | 6  | 1365 | 34  | 6798  | 7.48 | 0.0044 | 0.0374 | 6.95E-14 | Yes |
| EFO Disease      | Orphanet: 88616 | Autosomal recessive non-syndromic intellectual disability                                                                   | 12 | 1365 | 32  | 6798  | 7.48 | 0.0088 | 0.0352 | 7.97E-09 | Yes |
| EFO Disease      | EFO:0001360     | type II diabetes mellitus                                                                                                   | 14 | 1365 | 27  | 6798  | 7.48 | 0.0103 | 0.0297 | 1.10E-05 | Yes |
| EFO Disease      | Orphanet: 506   | Leigh syndrome                                                                                                              | 3  | 1365 | 24  | 6798  | 7.48 | 0.0022 | 0.0264 | 3.24E-11 | Yes |
| EFO Disease      | Orphanet: 2512  | Autosomal recessive primary microcephaly                                                                                    | 3  | 1365 | 21  | 6798  | 7.48 | 0.0022 | 0.0231 | 1.37E-09 | Yes |
| EFO Disease      | EFO:0000365     | colorectal adenocarcinoma                                                                                                   | 8  | 1365 | 20  | 6798  | 7.48 | 0.0059 | 0.0220 | 1.24E-05 | Yes |
| EFO Disease      | Orphanet: 84    | Fanconi anemia                                                                                                              | 15 | 1365 | 18  | 6798  | 7.48 | 0.0110 | 0.0198 | 2.64E-02 | Yes |



|                 |               |                                              |    |      |      |        |      |        |        |          |     |
|-----------------|---------------|----------------------------------------------|----|------|------|--------|------|--------|--------|----------|-----|
| EFO Disease     | EFO:0001365   | age-related macular degeneration             | 4  | 1365 | 17   | 6798   | 7.48 | 0.0029 | 0.0187 | 1.35E-06 | Yes |
| EFO Disease     | EFO:0000692   | schizophrenia                                | 8  | 1365 | 16   | 6798   | 7.48 | 0.0059 | 0.0176 | 7.00E-04 | Yes |
| EFO Disease     | Orphanet:666  | Osteogenesis imperfecta                      | 3  | 1365 | 16   | 6798   | 7.48 | 0.0022 | 0.0176 | 9.54E-07 | Yes |
| EFO Disease     | EFO:0000305   | breast carcinoma                             | 12 | 1365 | 15   | 6798   | 7.48 | 0.0088 | 0.0165 | 3.82E-02 | Yes |
| EFO Disease     | Orphanet:334  | Familial atrial fibrillation                 | 3  | 1365 | 14   | 6798   | 7.48 | 0.0022 | 0.0154 | 1.03E-05 | Yes |
| EFO Disease     | Orphanet:768  | Familial long QT syndrome                    | 9  | 1365 | 14   | 6798   | 7.48 | 0.0066 | 0.0154 | 1.05E-02 | Yes |
| EFO Disease     | Orphanet:1331 | Familial prostate cancer                     | 2  | 1365 | 13   | 6798   | 7.48 | 0.0015 | 0.0143 | 4.41E-06 | Yes |
| EFO Disease     | EFO:0002508   | Parkinson's disease                          | 12 | 1365 | 12   | 6798   | 7.48 | 0.0088 | 0.0132 | 2.27E-01 | No  |
| EFO Disease     | EFO:0000685   | rheumatoid arthritis                         | 5  | 1365 | 11   | 6798   | 7.48 | 0.0037 | 0.0121 | 3.52E-03 | Yes |
| KEGG Disease    | H00266        | Hereditary spastic paraplegia                | 20 | 1365 | 54   | 5985   | 6.92 | 0.0147 | 0.0624 | 1.73E-15 | Yes |
| KEGG Disease    | H01282        | Spermatogenic failure                        | 8  | 1365 | 39   | 5985   | 6.92 | 0.0059 | 0.0451 | 9.48E-16 | Yes |
| KEGG Disease    | H01202        | Cataract                                     | 10 | 1365 | 37   | 5985   | 6.92 | 0.0073 | 0.0428 | 2.56E-13 | Yes |
| KEGG Disease    | H01439        | Williams-Beuren syndrome                     | 21 | 1365 | 28   | 5985   | 6.92 | 0.0154 | 0.0324 | 4.68E-04 | Yes |
| KEGG Disease    | H00093        | Combined immunodeficiency                    | 25 | 1365 | 25   | 5985   | 6.92 | 0.0183 | 0.0289 | 3.26E-02 | Yes |
| KEGG Disease    | H00058        | Amyotrophic lateral sclerosis (ALS)          | 39 | 1365 | 24   | 5985   | 6.92 | 0.0286 | 0.0278 | 8.56E-01 | No  |
| KEGG Disease    | H02106        | Genetic obesity                              | 24 | 1365 | 24   | 5985   | 6.92 | 0.0176 | 0.0278 | 3.70E-02 | Yes |
| KEGG Disease    | H00048        | Hepatocellular carcinoma                     | 8  | 1365 | 20   | 5985   | 6.92 | 0.0059 | 0.0231 | 7.23E-06 | Yes |
| KEGG Disease    | H00831        | Primary dystonia                             | 11 | 1365 | 20   | 5985   | 6.92 | 0.0081 | 0.0231 | 1.64E-04 | Yes |
| KEGG Disease    | H02410        | Myelodysplastic/myeloproliferative neoplasms | 6  | 1365 | 20   | 5985   | 6.92 | 0.0044 | 0.0231 | 3.75E-07 | Yes |
| KEGG Disease    | H01360        | Allergic rhinitis                            | 5  | 1365 | 19   | 5985   | 6.92 | 0.0037 | 0.0220 | 2.92E-07 | Yes |
| KEGG Disease    | H00821        | Age-related macular degeneration             | 24 | 1365 | 17   | 5985   | 6.92 | 0.0176 | 0.0197 | 7.43E-01 | No  |
| KEGG Disease    | H01492        | Systemic sclerosis                           | 12 | 1365 | 17   | 5985   | 6.92 | 0.0088 | 0.0197 | 5.72E-03 | Yes |
| KEGG Disease    | H00018        | Gastric cancer                               | 15 | 1365 | 16   | 5985   | 6.92 | 0.0110 | 0.0185 | 6.27E-02 | No  |
| KEGG Disease    | H00032        | Thyroid cancer                               | 10 | 1365 | 16   | 5985   | 6.92 | 0.0073 | 0.0185 | 2.81E-03 | Yes |
| KEGG Disease    | H01667        | Medulloblastoma                              | 20 | 1365 | 16   | 5985   | 6.92 | 0.0147 | 0.0185 | 4.25E-01 | No  |
| KEGG Disease    | H02411        | Chronic myelomonocytic leukemia              | 10 | 1365 | 16   | 5985   | 6.92 | 0.0073 | 0.0185 | 2.81E-03 | Yes |
| KEGG Disease    | H00403        | Disorders of nucleotide excision repair      | 11 | 1365 | 13   | 5985   | 6.92 | 0.0081 | 0.0150 | 5.17E-02 | No  |
| KEGG Disease    | H00025        | Penile cancer                                | 14 | 1365 | 11   | 5985   | 6.92 | 0.0103 | 0.0127 | 5.85E-01 | No  |
| KEGG Disease    | H00042        | Glioma                                       | 13 | 1365 | 11   | 5985   | 6.92 | 0.0095 | 0.0127 | 4.10E-01 | No  |
| Phenotype (HPO) | HP:0000707    | Abnormality of the nervous system            | 0  | 1365 | 3175 | 552814 | 9.22 | 0.0000 | 0.0530 | 1.37E-32 | Yes |

|                 |            |                                          |    |      |      |        |      |        |        |          |     |
|-----------------|------------|------------------------------------------|----|------|------|--------|------|--------|--------|----------|-----|
| Phenotype (HPO) | HP:0000152 | Abnormality of head or neck              | 0  | 1365 | 2597 | 552814 | 9.22 | 0.0000 | 0.0433 | 1.13E-26 | Yes |
| Phenotype (HPO) | HP:0000924 | Abnormality of the skeletal system       | 0  | 1365 | 2572 | 552814 | 9.22 | 0.0000 | 0.0429 | 2.73E-26 | Yes |
| Phenotype (HPO) | HP:0003011 | Abnormality of the musculature           | 0  | 1365 | 2295 | 552814 | 9.22 | 0.0000 | 0.0383 | 1.43E-23 | Yes |
| Phenotype (HPO) | HP:0025031 | Abnormality of the digestive system      | 0  | 1365 | 2287 | 552814 | 9.22 | 0.0000 | 0.0382 | 2.31E-23 | Yes |
| Phenotype (HPO) | HP:0001626 | Abnormality of the cardiovascular system | 0  | 1365 | 2137 | 552814 | 9.22 | 0.0000 | 0.0357 | 8.03E-22 | Yes |
| Phenotype (HPO) | HP:0000119 | Abnormality of the genitourinary system  | 1  | 1365 | 2103 | 552814 | 9.22 | 0.0007 | 0.0351 | 5.84E-20 | Yes |
| Phenotype (HPO) | HP:0001507 | Growth abnormality                       | 0  | 1365 | 2092 | 552814 | 9.22 | 0.0000 | 0.0349 | 1.60E-21 | Yes |
| Phenotype (HPO) | HP:0001939 | Abnormality of metabolism/homeostasis    | 7  | 1365 | 2031 | 552814 | 9.22 | 0.0051 | 0.0339 | 1.12E-12 | Yes |
| Phenotype (HPO) | HP:0012443 | Abnormality of brain morphology          | 0  | 1365 | 2027 | 552814 | 9.22 | 0.0000 | 0.0338 | 7.75E-21 | Yes |
| Phenotype (HPO) | HP:0011804 | Abnormal muscle physiology               | 0  | 1365 | 2004 | 552814 | 9.22 | 0.0000 | 0.0334 | 1.87E-20 | Yes |
| Phenotype (HPO) | HP:0040064 | Abnormality of limbs                     | 0  | 1365 | 1761 | 552814 | 9.22 | 0.0000 | 0.0294 | 4.03E-18 | Yes |
| Phenotype (HPO) | HP:0100022 | Abnormality of movement                  | 0  | 1365 | 1707 | 552814 | 9.22 | 0.0000 | 0.0285 | 1.28E-17 | Yes |
| Phenotype (HPO) | HP:0000951 | Abnormality of the skin                  | 1  | 1365 | 1705 | 552814 | 9.22 | 0.0007 | 0.0284 | 5.99E-16 | Yes |
| Phenotype (HPO) | HP:0001250 | Seizure                                  | 1  | 1365 | 1514 | 552814 | 9.22 | 0.0007 | 0.0253 | 6.17E-14 | Yes |
| Phenotype (HPO) | HP:0000708 | Behavioral abnormality                   | 1  | 1365 | 1389 | 552814 | 9.22 | 0.0007 | 0.0232 | 8.17E-13 | Yes |
| Phenotype (HPO) | HP:0004325 | Decreased body weight                    | 0  | 1365 | 1117 | 552814 | 9.22 | 0.0000 | 0.0186 | 1.41E-11 | Yes |
| Phenotype (HPO) | HP:0004322 | Short stature                            | 0  | 1365 | 1098 | 552814 | 9.22 | 0.0000 | 0.0183 | 2.05E-11 | Yes |
| Phenotype (HPO) | HP:0031826 | Abnormal reflex                          | 0  | 1365 | 1020 | 552814 | 9.22 | 0.0000 | 0.0170 | 1.43E-10 | Yes |
| Phenotype (HPO) | HP:0002664 | Neoplasm                                 | 8  | 1365 | 805  | 552814 | 9.22 | 0.0059 | 0.0134 | 1.26E-02 | Yes |
| Drug            | DB12010    | Fostamatinib                             | 60 | 1365 | 304  | 19028  | 7.66 | 0.0440 | 0.1223 | 3.04E-22 | Yes |
| Drug            | DB00157    | NADH                                     | 37 | 1365 | 144  | 19028  | 7.66 | 0.0271 | 0.0580 | 2.47E-07 | Yes |
| Drug            | DB01593    | Zinc                                     | 29 | 1365 | 124  | 19028  | 7.66 | 0.0212 | 0.0499 | 1.80E-07 | Yes |
| Drug            | DB11638    | Artenimol                                | 32 | 1365 | 107  | 19028  | 7.66 | 0.0234 | 0.0431 | 2.51E-04 | Yes |
| Drug            | DB02379    | Beta-D-Glucose                           | 2  | 1365 | 78   | 19028  | 7.66 | 0.0015 | 0.0314 | 8.02E-16 | Yes |
| Drug            | DB00142    | Glutamic acid                            | 10 | 1365 | 69   | 19028  | 7.66 | 0.0073 | 0.0278 | 2.67E-07 | Yes |
| Drug            | DB00334    | Olanzapine                               | 0  | 1365 | 48   | 19028  | 7.66 | 0.0000 | 0.0193 | 1.13E-11 | Yes |
| Drug            | DB00543    | Amoxapine                                | 0  | 1365 | 44   | 19028  | 7.66 | 0.0000 | 0.0177 | 1.34E-10 | Yes |
| Drug            | DB12695    | Phenethyl Isothiocyanate                 | 28 | 1365 | 44   | 19028  | 7.66 | 0.0205 | 0.0177 | 4.58E-01 | No  |
| Drug            | DB08231    | Myristic acid                            | 2  | 1365 | 43   | 19028  | 7.66 | 0.0015 | 0.0173 | 4.87E-08 | Yes |
| Drug            | DB00321    | Amitriptyline                            | 0  | 1365 | 35   | 19028  | 7.66 | 0.0000 | 0.0141 | 1.74E-08 | Yes |
| Drug            | DB00555    | Lamotrigine                              | 3  | 1365 | 35   | 19028  | 7.66 | 0.0022 | 0.0141 | 2.13E-05 | Yes |
| Drug            | DB01708    | Prasterone                               | 0  | 1365 | 35   | 19028  | 7.66 | 0.0000 | 0.0141 | 1.74E-08 | Yes |
| Drug            | DB11093    | Calcium citrate                          | 6  | 1365 | 33   | 19028  | 7.66 | 0.0044 | 0.0133 | 2.39E-03 | Yes |

|                  |         |               |    |      |     |       |      |        |        |          |     |
|------------------|---------|---------------|----|------|-----|-------|------|--------|--------|----------|-----|
| Drug             | DB00201 | Caffeine      | 13 | 1365 | 32  | 19028 | 7.66 | 0.0095 | 0.0129 | 3.78E-01 | No  |
| Drug             | DB00408 | Loxapine      | 1  | 1365 | 32  | 19028 | 7.66 | 0.0007 | 0.0129 | 1.11E-06 | Yes |
| Drug             | DB00909 | Zonisamide    | 5  | 1365 | 31  | 19028 | 7.66 | 0.0037 | 0.0125 | 1.68E-03 | Yes |
| Drug             | DB00312 | Pentobarbital | 0  | 1365 | 28  | 19028 | 7.66 | 0.0000 | 0.0113 | 6.09E-07 | Yes |
| Drug             | DB04216 | Quercetin     | 9  | 1365 | 28  | 19028 | 7.66 | 0.0066 | 0.0113 | 1.36E-01 | No  |
| Drug             | DB00363 | Clozapine     | 0  | 1365 | 27  | 19028 | 7.66 | 0.0000 | 0.0109 | 9.00E-07 | Yes |
| Gene/<br>Protein | Q6A162  | KRT40         | 1  | 1365 | 275 | 62455 | 8.42 | 0.0007 | 0.0371 | 5.84E-21 | Yes |
| Gene/<br>Protein | Q08379  | GOLGA2        | 2  | 1365 | 248 | 62455 | 8.42 | 0.0015 | 0.0334 | 2.21E-17 | Yes |
| Gene/<br>Protein | Q7Z3S9  | NOTCH2NLA     | 8  | 1365 | 208 | 62455 | 8.42 | 0.0059 | 0.0280 | 7.47E-09 | Yes |
| Gene/<br>Protein | P60409  | KRTAP10-7     | 4  | 1365 | 197 | 62455 | 8.42 | 0.0029 | 0.0266 | 2.46E-11 | Yes |
| Gene/<br>Protein | P14373  | TRIM27        | 1  | 1365 | 172 | 62455 | 8.42 | 0.0007 | 0.0232 | 1.13E-12 | Yes |
| Gene/<br>Protein | P50222  | MEOX2         | 8  | 1365 | 167 | 62455 | 8.42 | 0.0059 | 0.0225 | 2.47E-06 | Yes |
| Gene/<br>Protein | Q15323  | KRT31         | 4  | 1365 | 161 | 62455 | 8.42 | 0.0029 | 0.0217 | 1.11E-08 | Yes |
| Gene/<br>Protein | P04637  | TP53          | 3  | 1365 | 155 | 62455 | 8.42 | 0.0022 | 0.0209 | 3.18E-09 | Yes |
| Gene/<br>Protein | P60410  | KRTAP10-8     | 3  | 1365 | 155 | 62455 | 8.42 | 0.0022 | 0.0209 | 3.18E-09 | Yes |
| Gene/<br>Protein | P60411  | KRTAP10-9     | 3  | 1365 | 153 | 62455 | 8.42 | 0.0022 | 0.0206 | 4.58E-09 | Yes |
| Gene/<br>Protein | Q04864  | REL           | 14 | 1365 | 152 | 62455 | 8.42 | 0.0103 | 0.0205 | 6.21E-03 | Yes |
| Gene/<br>Protein | Q99750  | MDF1          | 4  | 1365 | 149 | 62455 | 8.42 | 0.0029 | 0.0201 | 6.20E-08 | Yes |
| Gene/<br>Protein | Q9BRK4  | LZTS2         | 1  | 1365 | 146 | 62455 | 8.42 | 0.0007 | 0.0197 | 1.08E-10 | Yes |
| Gene/<br>Protein | Q5JR59  | MTUS2         | 7  | 1365 | 145 | 62455 | 8.42 | 0.0051 | 0.0195 | 1.41E-05 | Yes |
| Gene/<br>Protein | O00560  | SDCBP         | 9  | 1365 | 140 | 62455 | 8.42 | 0.0066 | 0.0189 | 2.42E-04 | Yes |
| Gene/<br>Protein | P00533  | EGFR          | 6  | 1365 | 130 | 62455 | 8.42 | 0.0044 | 0.0175 | 3.19E-05 | Yes |
| Gene/<br>Protein | P15884  | TCF4          | 6  | 1365 | 130 | 62455 | 8.42 | 0.0044 | 0.0175 | 3.19E-05 | Yes |
| Gene/<br>Protein | Q12933  | TRAF2         | 1  | 1365 | 128 | 62455 | 8.42 | 0.0007 | 0.0173 | 3.41E-09 | Yes |
| Gene/<br>Protein | P62993  | GRB2          | 7  | 1365 | 126 | 62455 | 8.42 | 0.0051 | 0.0170 | 1.63E-04 | Yes |
| Gene/<br>Protein | Q8TBB1  | LNX1          | 7  | 1365 | 122 | 62455 | 8.42 | 0.0051 | 0.0164 | 3.00E-04 | Yes |

\*  $g_D$ : number of KGs where term  $D$  is presented,  $G$ : total number of KGs,  $t$ : number of terms/nodes in each KG from the same biological component as term  $D$ ,  $M_D$ : the total number of genes/proteins that are associated with term  $D$ ,  $M_{sum}$ : the total number of associations between all genes/proteins and all terms in the same biological component as term  $D$ .

**Table S8.** The list of query terms for 1365 CROssBAR knowledge graphs.

| <b>Gene/protein queries (UniProt protein accessions)</b> |        |        |                                                                               |        |        |
|----------------------------------------------------------|--------|--------|-------------------------------------------------------------------------------|--------|--------|
| P41279                                                   | Q08881 | Q13370 | P50616                                                                        | P61081 | Q7LBR1 |
| Q9Y2M5                                                   | Q96QH2 | P17987 | Q86Y82                                                                        | Q30201 | Q96SB3 |
| Q5JZY3                                                   | A1L3X4 | P10636 | P40337                                                                        | Q5T5X7 | Q9UBQ0 |
| Q92841                                                   | Q8NAV1 | Q15653 | Q9H3H3                                                                        | P28749 | Q8NFJ9 |
| Q9NPG2                                                   | P15336 | Q5T5A8 | Q14669                                                                        | Q6IQ23 | Q9UBT7 |
| Q96Q35                                                   | Q5T4F4 | Q9P0T4 | Q5W5X9                                                                        | Q2TAY7 | Q12906 |
| Q9UQ90                                                   | O14745 | Q13064 | P04233                                                                        | Q9HD67 | O95447 |
| P04233                                                   | P43034 | Q8TEW0 | O60885                                                                        | Q9UJY4 | Q14978 |
| Q9HCJ0                                                   | P48729 | Q969Q1 | P11831                                                                        | P42768 | Q96A56 |
| Q9HCU8                                                   | Q86U70 | Q3T906 | O75022                                                                        | P07195 | Q6W2J9 |
| P40617                                                   | Q13127 | O60563 | Q13835                                                                        | P55199 | P46098 |
| Q96AH0                                                   | P23467 | Q8TBZ8 | O76071                                                                        | Q9NZL4 | P09228 |
| Q70UQ0                                                   | Q9P0U4 | Q14919 | Q9NX70                                                                        | Q53GG5 | Q14164 |
| O60566                                                   | Q86Y13 | Q9BYE7 | Q8TBC4                                                                        | P09913 | Q5T124 |
| Q969T4                                                   | P49760 | Q9H0F6 | Q9BU76                                                                        | P67775 | B2RUY7 |
| Q9UJ04                                                   | Q9Y2X0 | Q14152 | Q15025                                                                        | O96028 | Q53GI3 |
| Q7L4P6                                                   | P36896 | P16473 | Q6IBW4                                                                        | Q09FC8 | Q9UNI6 |
| O43704                                                   | P60981 | O15116 | Q01484                                                                        | P43351 | Q92688 |
| Q9NQX5                                                   | B2RUY7 | O00303 | Q9UGP5                                                                        | Q96GE4 | O14936 |
| O15389                                                   | Q8IYX3 | Q8NDC4 | O00512                                                                        | Q8NA82 | Q8WYQ5 |
| P48061                                                   | O75581 | Q8N5A5 | Q9NRM7                                                                        | Q96GS4 | O43561 |
| P46779                                                   | P09629 | Q9UQM7 | Q5TD97                                                                        | P09622 | O43157 |
| Q06455                                                   | Q9P0L0 | P30307 | O15131                                                                        | Q9Y223 | Q04941 |
| O95983                                                   | Q15459 | Q13064 | Q15528                                                                        | Q13867 | P29373 |
| Q92636                                                   | O15524 | Q13496 | Q14562                                                                        | Q9UBU8 | Q504Q3 |
| O14613                                                   | P26678 | Q66K89 | Q9BYM8                                                                        | Q7Z7H3 | P61962 |
| Q9Y2R2                                                   | Q14929 | Q16629 | P13688                                                                        | P38432 | O75031 |
| P29144                                                   | O14627 | Q71DI3 | Q9UBU8                                                                        | Q08AF8 | Q96EQ0 |
| Q01201                                                   | P50461 | P51668 | O14653                                                                        | O15031 | O95352 |
| Q8N9W6                                                   | Q13363 | Q49A88 | Q71U36                                                                        | P84090 | O75564 |
| O60684                                                   | Q6XZF7 | Q9BYQ2 | P28749                                                                        | Q13541 |        |
| Q96BY2                                                   | O00746 | Q9HCU9 | Q8TDY4                                                                        | Q15399 |        |
| Q9H0I2                                                   | Q92556 | P35240 | Q13049                                                                        | P08670 |        |
| O15085                                                   | Q969G2 | Q15262 | Q8IYX3                                                                        | P55735 |        |
| <b>Reactome pathway queries (pathway names)</b>          |        |        |                                                                               |        |        |
| Neurofascin interactions                                 |        |        | Activation of DNA fragmentation factor                                        |        |        |
| tRNA processing in the mitochondrion                     |        |        | DEx/H-box helicases activate type I IFN and inflammatory cytokines production |        |        |
| Translocation of ZAP-70 to Immunological synapse         |        |        | IRAK1 recruits IKK complex upon TLR7/8 or 9 stimulation                       |        |        |
| Negative regulation of the PI3K/AKT network              |        |        | Endosomal/Vacuolar pathway                                                    |        |        |

|                                                                                              |                                                                              |
|----------------------------------------------------------------------------------------------|------------------------------------------------------------------------------|
| Pyrimidine catabolism                                                                        | Synthesis of IP3 and IP4 in the cytosol                                      |
| Trafficking of AMPA receptors                                                                | VLDLR internalisation and degradation                                        |
| IRAK1 recruits IKK complex                                                                   | Transport of Ribonucleoproteins into the Host Nucleus                        |
| AXIN missense mutants destabilize the destruction complex                                    | ERCC6 (CSB) and EHMT2 (G9a) positively regulate rRNA expression              |
| Removal of aminoterminal propeptides from gamma-carboxylated proteins                        | Chylomicron assembly                                                         |
| Recognition and association of DNA glycosylase with site containing an affected pyrimidine   | SeMet incorporation into proteins                                            |
| CTLA4 inhibitory signaling                                                                   | Other interleukin signaling                                                  |
| Presynaptic phase of homologous DNA pairing and strand exchange                              | Tristetraprolin (TTP, ZFP36) binds and destabilizes mRNA                     |
| Phosphate bond hydrolysis by NUDT proteins                                                   | Highly calcium permeable postsynaptic nicotinic acetylcholine receptors      |
| PI-3K cascade:FGFR3                                                                          | Regulation of signaling by NODAL                                             |
| Netrin mediated repulsion signals                                                            | DNA methylation                                                              |
| Glyoxylate metabolism and glycine degradation                                                | Surfactant metabolism                                                        |
| Pausing and recovery of HIV elongation                                                       | Hh mutants that don't undergo autocatalytic processing are degraded by ERAD  |
| Beta oxidation of decanoyl-CoA to octanoyl-CoA-CoA                                           | PLC beta mediated events                                                     |
| Estrogen biosynthesis                                                                        | Attenuation phase                                                            |
| NTRK2 activates RAC1                                                                         | Cristae formation                                                            |
| Fibronectin matrix formation                                                                 | Bicarbonate transporters                                                     |
| Formation of HIV elongation complex in the absence of HIV Tat                                | Formation of TC-NER Pre-Incision Complex                                     |
| Fatty acyl-CoA biosynthesis                                                                  | SUMOylation of SUMOylation proteins                                          |
| MECP2 regulates transcription factors                                                        | SUMO is conjugated to E1 (UBA2:SAE1)                                         |
| TRAF6 mediated IRF7 activation in TLR7/8 or 9 signaling                                      | FasL/ CD95L signaling                                                        |
| Heme degradation                                                                             | Cross-presentation of soluble exogenous antigens (endosomes)                 |
| Carboxyterminal post-translational modifications of tubulin                                  | Mismatch repair (MMR) directed by MSH2:MSH3 (MutSbeta)                       |
| TFAP2A acts as a transcriptional repressor during retinoic acid induced cell differentiation | Methionine salvage pathway                                                   |
| Electric Transmission Across Gap Junctions                                                   | Glutathione conjugation                                                      |
| Eicosanoids                                                                                  | Clathrin derived vesicle budding                                             |
| Signal regulatory protein family interactions                                                | DAG and IP3 signaling                                                        |
| Mitochondrial Fatty Acid Beta-Oxidation                                                      | Regulation of necroptotic cell death                                         |
| Opsins                                                                                       | Meiotic recombination                                                        |
| Intraflagellar transport                                                                     | Signaling by cytosolic FGFR1 fusion mutants                                  |
| Synthesis of glycosylphosphatidylinositol (GPI)                                              | mitochondrial fatty acid beta-oxidation of unsaturated fatty acids           |
| Electric Transmission Across Gap Junctions                                                   | Negative regulation of activity of TFAP2 (AP-2) family transcription factors |
| Advanced glycosylation endproduct receptor signaling                                         | Norepinephrine Neurotransmitter Release Cycle                                |
| N-Glycan antennae elongation                                                                 | Stabilization of p53                                                         |
| Truncations of AMER1 destabilize the destruction complex                                     | Glutathione conjugation                                                      |
| VxPx cargo-targeting to cilium                                                               | Serotonin receptors                                                          |
| Ficolins bind to repetitive carbohydrate structures on the target cell surface               | PTK6 Expression                                                              |
| PTK6 Expression                                                                              | Aryl hydrocarbon receptor signalling                                         |
| RAF-independent MAPK1/3 activation                                                           | NCAM signaling for neurite out-growth                                        |

|                                                    |                                                                                              |
|----------------------------------------------------|----------------------------------------------------------------------------------------------|
| RUNX3 regulates BCL2L11 (BIM) transcription        | RUNX1 and FOXP3 control the development of regulatory T lymphocytes (Tregs)                  |
| p130Cas linkage to MAPK signaling for integrins    | Phase 4 - resting membrane potential                                                         |
| PI3K events in ERBB2 signaling                     | TFAP2A acts as a transcriptional repressor during retinoic acid induced cell differentiation |
| Synthesis of IP3 and IP4 in the cytosol            | PI3K Cascade                                                                                 |
| Activation of E2F1 target genes at G1/S            | Interleukin-3, Interleukin-5 and GM-CSF signaling                                            |
| Nitric oxide stimulates guanylate cyclase          | SMAC(DIABLO)-mediated dissociation of IAP:caspase complexes                                  |
| CHL1 interactions                                  | Synthesis of PA                                                                              |
| <b><u>KEGG pathway queries (pathway names)</u></b> |                                                                                              |
| Various types of N-glycan biosynthesis             | N-Glycan biosynthesis                                                                        |
| Lipoic acid metabolism                             | Starch and sucrose metabolism                                                                |
| Glycosaminoglycan biosynthesis                     | Glutathione metabolism                                                                       |
| Porphyrin and chlorophyll metabolism               | Glycosphingolipid biosynthesis                                                               |
| Carbohydrate digestion and absorption              | Circadian rhythm                                                                             |
| Ascorbate and aldarate metabolism                  | Pentose and glucuronate interconversions                                                     |
| Glycosphingolipid biosynthesis                     | Aminoacyl-tRNA biosynthesis                                                                  |
| Thiamine metabolism                                | Butanoate metabolism                                                                         |
| Thiamine metabolism                                | Pyruvate metabolism                                                                          |
| Vasopressin-regulated water reabsorption           | N-Glycan biosynthesis                                                                        |
| Ascorbate and aldarate metabolism                  | Arginine and proline metabolism                                                              |
| Synthesis and degradation of ketone bodies         | N-Glycan biosynthesis                                                                        |
| Sphingolipid metabolism                            | SNARE interactions in vesicular transport                                                    |
| Non-homologous end-joining                         | Sphingolipid metabolism                                                                      |
| Riboflavin metabolism                              | Galactose metabolism                                                                         |
| Fatty acid degradation                             | Riboflavin metabolism                                                                        |
| Hedgehog signaling pathway                         | Tyrosine metabolism                                                                          |
| beta-Alanine metabolism                            | Cholesterol metabolism                                                                       |
| Thiamine metabolism                                | Biosynthesis of unsaturated fatty acids                                                      |
| Pentose phosphate pathway                          | Synthesis and degradation of ketone bodies                                                   |
| SNARE interactions in vesicular transport          | DNA replication                                                                              |
| Circadian rhythm                                   | Notch signaling pathway                                                                      |
| Sphingolipid metabolism                            | Other types of O-glycan biosynthesis                                                         |
| Carbohydrate digestion and absorption              | Hedgehog signaling pathway                                                                   |
| Synthesis and degradation of ketone bodies         | One carbon pool by folate                                                                    |
| Glycosaminoglycan biosynthesis                     | Citrate cycle (TCA cycle)                                                                    |
| Homologous recombination                           | Vitamin digestion and absorption                                                             |
| Taurine and hypotaurine metabolism                 | Arginine biosynthesis                                                                        |
| Cysteine and methionine metabolism                 | Biosynthesis of unsaturated fatty acids                                                      |
| Citrate cycle (TCA cycle)                          | Mannose type O-glycan biosynthesis                                                           |
| Steroid biosynthesis                               | Synthesis and degradation of ketone bodies                                                   |
| Starch and sucrose metabolism                      | Proximal tubule bicarbonate reclamation                                                      |
| Base excision repair                               | Synthesis and degradation of ketone bodies                                                   |

|                                                              |                                                                    |
|--------------------------------------------------------------|--------------------------------------------------------------------|
| Linoleic acid metabolism                                     | Pentose phosphate pathway                                          |
| Sulfur metabolism                                            | Other types of O-glycan biosynthesis                               |
| Selenocompound metabolism                                    | N-Glycan biosynthesis                                              |
| N-Glycan biosynthesis                                        | Steroid biosynthesis                                               |
| Various types of N-glycan biosynthesis                       | Nicotinate and nicotinamide metabolism                             |
| Propanoate metabolism                                        | Vitamin digestion and absorption                                   |
| Taurine and hypotaurine metabolism                           | Renin-angiotensin system                                           |
| Apoptosis                                                    | Butanoate metabolism                                               |
| Glycine, serine and threonine metabolism                     | Steroid biosynthesis                                               |
| Glycosylphosphatidylinositol (GPI)-anchor biosynthesis       | Circadian rhythm                                                   |
| beta-Alanine metabolism                                      | Mucin type O-glycan biosynthesis                                   |
| Riboflavin metabolism                                        | Glyoxylate and dicarboxylate metabolism                            |
| Vitamin B6 metabolism                                        | Caffeine metabolism                                                |
| Glycosphingolipid biosynthesis                               | Fructose and mannose metabolism                                    |
| Glycosaminoglycan biosynthesis                               | Cholesterol metabolism                                             |
| Pantothenate and CoA biosynthesis                            | Glycine, serine and threonine metabolism                           |
| Riboflavin metabolism                                        | Histidine metabolism                                               |
| <b><u>EFO disease queries (disease names)</u></b>            |                                                                    |
| Infantile bilateral striatal necrosis                        | Isolated focal cortical dysplasia type IIa                         |
| sporadic amyotrophic lateral sclerosis                       | HIV-1 infection                                                    |
| Cowden syndrome                                              | Hyper-IgM syndrome with susceptibility to opportunistic infections |
| Alzheimer's disease                                          | Generalized epilepsy with febrile seizures-plus                    |
| Hypokalemic periodic paralysis                               | Split hand-split foot malformation                                 |
| Rh deficiency syndrome                                       | Renal tubular dysgenesis of genetic origin                         |
| familial hypercholesterolemia                                | Sulfite oxidase deficiency due to molybdenum cofactor deficiency   |
| Primary hyperoxaluria                                        | Adams-Oliver syndrome                                              |
| Short rib-polydactyly syndrome                               | restless legs syndrome                                             |
| Autosomal recessive cutis laxa type 2                        | Stargardt disease                                                  |
| Generalized pustular psoriasis                               | Autosomal dominant progressive external ophthalmoplegia            |
| embryonal rhabdomyosarcoma                                   | focal segmental glomerulosclerosis                                 |
| Ehlers-Danlos syndrome, classic type                         | Stargardt disease                                                  |
| Familial hemophagocytic lymphohistiocytosis                  | Fetal akinesia deformation sequence                                |
| Matthew-Wood syndrome                                        | Zimmermann-Laband syndrome                                         |
| Activated PIK3-delta syndrome                                | Lamellar ichthyosis                                                |
| Familial infantile bilateral striatal necrosis               | Autosomal recessive distal renal tubular acidosis                  |
| Localized junctional epidermolysis bullosa, non-Herlitz type | Distal hereditary motor neuropathy type 2                          |
| Branchio-otic syndrome                                       | Tangier disease                                                    |
| Primary systemic amyloidosis                                 | Persistent Müllerian duct syndrome                                 |
| Syndactyly type 2                                            | Paroxysmal nocturnal hemoglobinuria                                |
| Distal myopathy, Nonaka type                                 | Juvenile or adult CACH syndrome                                    |
| MELAS                                                        | Generalized junctional epidermolysis bullosa, non-Herlitz type     |

|                                                              |                                                                            |
|--------------------------------------------------------------|----------------------------------------------------------------------------|
| Facioscapulohumeral dystrophy                                | Familial hypodysfibrinogenemia                                             |
| Krabbe disease                                               | Ondine syndrome                                                            |
| Agammaglobulinemia                                           | chronic myeloproliferative disorder                                        |
| Familial focal epilepsy with variable foci                   | red-green color blindness                                                  |
| obsolete_Alagille syndrome                                   | Cardiofaciocutaneous syndrome                                              |
| congenital disorder of glycosylation type II                 | Junctional epidermolysis bullosa, non-Herlitz type                         |
| Immunodeficiency due to a complement cascade protein anomaly | Juvenile polyposis of infancy                                              |
| Annular epidermolytic ichthyosis                             | Hereditary chronic pancreatitis                                            |
| Dowling-Degos disease                                        | Hyper-IgM syndrome with susceptibility to opportunistic infections         |
| Lethal congenital contracture syndrome type 3                | Mitochondrial myopathy and sideroblastic anemia                            |
| Partial pancreatic agenesis                                  | Coffin-Siris syndrome                                                      |
| Pontocerebellar hypoplasia type 1                            | Combined pituitary hormone deficiencies, genetic forms                     |
| congenital heart malformation                                | Phosphoenolpyruvate carboxykinase deficiency                               |
| Oligodontia                                                  | Myopia                                                                     |
| Waardenburg syndrome type 2                                  | Perrault syndrome                                                          |
| Autosomal recessive spastic ataxia with leukoencephalopathy  | Sotos syndrome                                                             |
| Adenosine monophosphate deaminase deficiency                 | Uncombable hair syndrome                                                   |
| Pseudoxanthoma elasticum                                     | Kenny-Caffey syndrome                                                      |
| Congenital muscular dystrophy, Ullrich type                  | X-linked non-syndromic sensorineural deafness type DFN                     |
| Saldino-Mainzer syndrome                                     | Piebaldism                                                                 |
| Familial hypospadias                                         | Triphalangeal thumb - polysyndactyly syndrome                              |
| Schizencephaly                                               | Barrett's esophagus                                                        |
| Prader-Willi syndrome                                        | osteoporosis                                                               |
| medulloblastoma                                              | De Barsy syndrome                                                          |
| Posterior polar cataract                                     | Metaphyseal anadysplasia                                                   |
| Rare isolated myopia                                         | Jeune syndrome                                                             |
| Lacrimoauriculodentodigital syndrome                         | Familial episodic pain syndrome                                            |
| <b><u>KEGG disease queries (disease names)</u></b>           |                                                                            |
| Pitt-Hopkins syndrome                                        | Autosomal dominant tubulointerstitial kidney disease                       |
| Spastic quadriplegic cerebral palsy                          | Chromosome 15q13.3 microdeletion syndrome                                  |
| 3MC syndrome                                                 | Bruck syndrome                                                             |
| Proximal symphalangism                                       | Fatal infantile cardioencephalomyopathy                                    |
| SEMD with joint laxity type                                  | Thalassemia                                                                |
| Familial epilepsy temporal lobe (ETL)                        | Vogt-Koyanagi-Harada syndrome                                              |
| Hyperkalemic distal renal tubular acidosis (RTA type 4)      | Medullary thyroid cancer                                                   |
| Anemia due to disorders of nucleotide metabolism             | Pachyonychia congenita                                                     |
| Primary hyperparathyroidism                                  | Postaxial polydactyly                                                      |
| Multi-minicore disease                                       | Coronary artery disease                                                    |
| Anemia due to disorders of glutathione metabolism            | Cerebral creatine deficiency syndrome                                      |
| D-2-hydroxyglutaric aciduria                                 | Infantile hypotonia with psychomotor retardation and characteristic facies |
| Immunodeficiency associated with DNA repair defects          | Non-epidermolytic palmoplantar keratoderma                                 |



|                                                  |                                                             |                         |
|--------------------------------------------------|-------------------------------------------------------------|-------------------------|
| Oculocutaneous albinism                          | Xeroderma pigmentosum                                       |                         |
| Dandy-Walker syndrome                            | Van Maldergem syndrome                                      |                         |
| Other phagocyte defects                          | Familial Mediterranean fever                                |                         |
| Rett syndrome                                    | Familial partial lipodystrophy                              |                         |
| Anemia due to disorders of nucleotide metabolism | Wiskott-Aldrich syndrome                                    |                         |
| Celiac disease                                   | Mismatch repair deficiency                                  |                         |
| Warburg micro syndrome                           | Pattern dystrophies of the retinal pigment epithelium       |                         |
| AMP deaminase deficiency                         | Vesicoureteral reflux                                       |                         |
| Bare lymphocyte syndrome type2                   | Bilateral sudden sensorineural hearing loss                 |                         |
| Familial focal epilepsy with variable foci       | Pituitary adenomas                                          |                         |
| Obsessive-compulsive disorder                    | Lymphangioliomyomatosis                                     |                         |
| Hyperbilirubinemia                               | Radioulnar synostosis with amegakaryocytic thrombocytopenia |                         |
| Chronic granulomatous disease                    | Down syndrome                                               |                         |
| Central areolar choroidal dystrophy              | Permanent neonatal diabetes mellitus                        |                         |
| Congenital adrenal hyperplasia                   | Myelofibrosis                                               |                         |
| Lewy body dementia (LBD)                         | Pyruvate dehydrogenase complex deficiency                   |                         |
| Nonsyndromic congenital nail disorder            | Ectopia lentis                                              |                         |
| Polycystic liver disease                         | Blue cone monochromacy                                      |                         |
| Hereditary hypotrichosis simplex                 | Heparan sulfate proteoglycan gene defects                   |                         |
| Zimmermann-Laband syndrome                       | Dyslexia                                                    |                         |
| Oral cancer                                      | Porencephaly                                                |                         |
| Familial hemophagocytic lymphohistiocytosis      | Hypopituitarism                                             |                         |
| Malignant paraganglioma                          | Kearns-Sayre syndrome                                       |                         |
| Spondyloepiphyseal dysplasia tarda               | Hereditary stomatocytosis                                   |                         |
| Ellis-van Creveld syndrome                       | Dent disease                                                |                         |
| Primary aldosteronism                            | Desbuquois syndrome                                         |                         |
| Familial Mediterranean fever                     | Tuberous sclerosis complex                                  |                         |
| Congenital mirror movements                      | Scapuloperoneal myopathy                                    |                         |
| Budd-Chiari syndrome                             | Hyperlipidemia                                              |                         |
| Mosaic variegated aneuploidy syndrome            | Microphthalmia with linear skin defects syndrome            |                         |
| Tricho-hepato-enteric syndrome                   | Vogt-Koyanagi-Harada syndrome                               |                         |
| Multiple sclerosis                               | Xanthinuria                                                 |                         |
| Pseudoxanthoma elasticum                         | Cerebral creatine deficiency syndrome                       |                         |
| Frontonasal dysplasia                            | Familial adult myoclonic epilepsy                           |                         |
| Emery-Dreifuss muscular dystrophy                | Brachyolmia                                                 |                         |
| Miyoshi myopathy                                 | Nocturnal frontal lobe epilepsy                             |                         |
| Tyrosinemia                                      | Infantile liver failure                                     |                         |
| <b><u>Phenotype queries (HPO term name)</u></b>  |                                                             |                         |
| Abnormal thalamic size                           | Ulnar deviation of the 2nd finger                           | Broad alveolar ridges   |
| Recurrent cutaneous abscess formation            | Decreased serum estradiol                                   | Episodic abdominal pain |
| Prolinuria                                       | Abnormal vitreous humor morphology                          | Bowel incontinence      |

|                                                     |                                                       |                                                 |
|-----------------------------------------------------|-------------------------------------------------------|-------------------------------------------------|
| Laryngeal hypoplasia                                | Upper eyelid coloboma                                 | Myoclonic spasms                                |
| Bull's eye maculopathy                              | Sudden death                                          | Conical incisor                                 |
| Fat malabsorption                                   | Periauricular skin pits                               | Anterior pituitary dysgenesis                   |
| Asymmetric growth                                   | Craniofacial asymmetry                                | Elevated alpha-fetoprotein                      |
| Hyperphosphaturia                                   | Arrhinencephaly                                       | Vertebral clefting                              |
| Temporal pattern                                    | Severe infection                                      | Metrorrhagia                                    |
| Abnormal foveal morphology                          | Decreased serum estradiol                             | Brachyuricephaly                                |
| Type 1 muscle fiber atrophy                         | Pierre-Robin sequence                                 | Abnormality of the 1st metacarpal               |
| Pustule                                             | Increased circulating renin level                     | Periodic hypokalemic paresis                    |
| Incomitant strabismus                               | Abdominal wall muscle weakness                        | Enchondroma                                     |
| Decreased circulating luteinizing hormone level     | Persistence of hemoglobin F                           | Pseudoepiphyses of hand bones                   |
| Hyperaldosteronism                                  | Reduced systolic function                             | Urinary bladder sphincter dysfunction           |
| Large earlobe                                       | Pseudoepiphyses of hand bones                         | Impaired T cell function                        |
| Decreased patellar reflex                           | Tracheomalacia                                        | Frontalis muscle weakness                       |
| Toxemia of pregnancy                                | Decreased serum leptin                                | Episodic respiratory distress                   |
| Exercise-induced myalgia                            | 11 pairs of ribs                                      | Centrocecal scotoma                             |
| Joint subluxation                                   | Metamorphopsia                                        | Severe intrauterine growth retardation          |
| Stooped posture                                     | Abnormal serum bile acid concentration                | Abnormal urine hormone level                    |
| Expressive language delay                           | Impaired proprioception                               | Visual acuity test abnormality                  |
| Deviation of the 5th toe                            | Reduced factor XIII activity                          | Barrett esophagus                               |
| Narrow vertebral interpedicular distance            | Aplasia/Hypoplasia involving the skeletal musculature | Narrow sacroiliac notch                         |
| Palmar hyperhidrosis                                | Enlarged pituitary gland                              | Quadriceps muscle weakness                      |
| Nasal regurgitation                                 | Epicanthus inversus                                   | Abnormal natural killer cell morphology         |
| Abnormal pupillary light reflex                     | Generalized hypopigmentation                          | Fetal distress                                  |
| Premature graying of hair                           | Hypokalemic alkalosis                                 | Abnormal renal collecting system morphology     |
| Acute lymphoblastic leukemia                        | Low serum calcitriol                                  | Low levels of vitamin A                         |
| Thin nail                                           | Macular edema                                         | Peritonitis                                     |
| Humeroradial synostosis                             | Aplasia/Hypoplasia of the cochlea                     | Choroidal neovascularization                    |
| EEG with spike-wave complexes (2.5-3.5 Hz)          | Flattened femoral epiphysis                           | Persistent bleeding after trauma                |
| Abnormality of the distal phalanx of the 5th finger | Female infertility                                    | Ectopia pupillae                                |
| Increased circulating cortisol level                | Caudate atrophy                                       | Abnormality of the intrahepatic bile duct       |
| Shallow acetabular fossae                           | Nephronophthisis                                      | Pendular nystagmus                              |
| Hypoplastic vertebral bodies                        | Progressive gait ataxia                               | Thromboembolism                                 |
| Thenar muscle atrophy                               | Septate vagina                                        | Torticollis                                     |
| Chronic hepatic failure                             | Abnormal circulating methionine concentration         | Intestinal pseudo-obstruction                   |
| Heat intolerance                                    | Patchy changes of bone mineral density                | Bilateral microphthalmos                        |
| Vertical supranuclear gaze palsy                    | Noncompaction cardiomyopathy                          | Reduced factor XII activity                     |
| Aplasia/Hypoplasia of the scapulae                  | Abnormal cell morphology                              | Triangular mouth                                |
| Hypoplastic heart                                   | Hyperintensity of cerebral white matter on MRI        | Abnormal response to endocrine stimulation test |
| Prominent supraorbital ridges                       | Abnormality of the ischium                            | Abnormality of DNA repair                       |

|                                                            |                                                 |                                                        |
|------------------------------------------------------------|-------------------------------------------------|--------------------------------------------------------|
| Decreased thalamic volume                                  | Reduced factor XI activity                      | Low plasma citrulline                                  |
| Recurrent infection of the gastrointestinal tract          | Abnormal size of pituitary gland                | Square face                                            |
| Thyrotoxicosis with diffuse goiter                         | Anteverted ears                                 | Sea-blue histiocytosis                                 |
| Acral ulceration                                           | Abnormal eyelid physiology                      | Absent toenail                                         |
| Anterior open bite                                         | Decreased patellar reflex                       | Calcification of falx cerebri                          |
| Rectal polyposis                                           | Prolonged bleeding time                         | Small basal ganglia                                    |
| Tracheomalacia                                             | Macrocephaly at birth                           | Accessory oral frenulum                                |
| Abnormality of the lumbar spine                            | Ovotestis                                       | Recurrent upper and lower respiratory tract infections |
| Leydig cell neoplasia                                      | Abnormal urine potassium concentration          | Retinal nonattachment                                  |
| Subglottic stenosis                                        | Aplasia/Hypoplasia of the phalanges of the toes | Neoplasm of the gallbladder                            |
| Abnormal sweat homeostasis                                 | Abnormality of the peritoneum                   | Oval face                                              |
| Pulmonary opacity                                          | Abnormal serum interferon-gamma level           | Abnormal mean corpuscular hemoglobin concentration     |
| Sparse axillary hair                                       | Hypercapnia                                     | Limb myoclonus                                         |
| Conjunctival hamartoma                                     | Multiple renal cysts                            | Erythema nodosum                                       |
| Abnormal renal artery morphology                           | Asymmetry of the thorax                         | Erythroderma                                           |
| Myofibrillar myopathy                                      | Low levels of vitamin E                         | Drowsiness                                             |
| Aplasia/Hypoplasia of the middle phalanx of the 2nd finger | Calcification of the aorta                      | Hypoproteinemia                                        |
| Angioid streaks of the fundus                              | Chylothorax                                     | Loss of subcutaneous adipose tissue in limbs           |
| Ulnar bowing                                               | Antiphospholipid antibody positivity            | Fetal distress                                         |
| Pseudoepiphyses of hand bones                              | Lower limb asymmetry                            | Calcium oxalate nephrolithiasis                        |
| Genu recurvatum                                            | Heparan sulfate excretion in urine              | Increased skull ossification                           |
| Writer's cramp                                             | Biliary atresia                                 | Focal impaired awareness seizure                       |
| Overfolded helix                                           | Thoracolumbar scoliosis                         | Hypoplastic ischia                                     |
| Aplasia of the musculature                                 | Hemoglobinuria                                  |                                                        |

**Drug queries (DrugBank drug id)**

|         |         |         |         |         |         |
|---------|---------|---------|---------|---------|---------|
| DB00193 | DB00054 | DB04841 | DB02526 | DB01686 | DB00848 |
| DB00798 | DB03434 | DB00275 | DB03876 | DB13995 | DB02402 |
| DB00521 | DB00677 | DB13346 | DB05552 | DB13179 | DB05169 |
| DB00592 | DB06401 | DB09092 | DB04573 | DB01083 | DB02375 |
| DB00673 | DB07150 | DB07664 | DB02142 | DB00431 | DB04576 |
| DB00039 | DB04132 | DB01561 | DB01744 | DB03900 | DB00521 |
| DB00736 | DB08867 | DB06594 | DB00066 | DB03403 | DB01364 |
| DB00587 | DB04237 | DB00004 | DB07841 | DB03541 | DB05472 |
| DB08217 | DB02329 | DB08018 | DB07857 | DB03900 | DB04846 |
| DB07218 | DB04574 | DB01011 | DB00399 | DB01766 | DB03691 |
| DB01118 | DB05944 | DB00541 | DB00985 | DB07374 | DB03309 |
| DB02076 | DB00657 | DB00146 | DB01050 | DB13994 | DB00374 |
| DB00093 | DB03487 | DB01033 | DB03945 | DB00433 | DB01834 |
| DB07091 | DB02557 | DB06021 | DB04083 | DB08888 | DB06831 |
| DB00610 | DB00591 | DB05882 | DB00636 | DB08855 | DB01353 |

|                                                     |               |               |               |               |               |
|-----------------------------------------------------|---------------|---------------|---------------|---------------|---------------|
| DB02559                                             | DB01268       | DB00641       | DB01558       | DB08073       | DB00275       |
| DB00129                                             | DB09244       | DB00820       | DB06714       | DB13923       | DB06719       |
| DB08403                                             | DB00613       | DB00431       | DB07652       | DB00383       | DB08402       |
| DB00322                                             | DB08811       | DB00368       | DB09033       | DB00122       | DB03136       |
| DB03449                                             | DB01011       | DB00243       | DB02153       | DB06831       | DB04334       |
| DB06070                                             | DB01234       | DB06802       | DB01062       | DB00877       | DB02515       |
| DB05459                                             | DB05777       | DB00322       | DB00048       | DB04557       | DB12228       |
| DB00938                                             | DB09166       | DB13151       | DB07218       | DB01103       | DB12698       |
| DB02559                                             | DB11691       | DB00823       | DB02824       | DB00098       | DB07662       |
| DB01043                                             | DB04185       | DB06202       | DB00044       | DB00210       | DB07137       |
| DB04387                                             | DB12023       | DB08896       | DB03128       | DB00414       | DB02281       |
| DB03088                                             | DB00610       | DB08059       | DB00276       | DB00565       | DB00545       |
| DB00692                                             | DB00530       | DB00590       | DB02552       | DB00912       | DB07530       |
| DB01592                                             | DB00656       | DB07131       | DB00472       | DB00031       | DB00294       |
| DB00125                                             | DB05676       | DB02998       | DB09052       | DB02701       | DB13951       |
| DB07812                                             | DB13872       | DB00181       | DB00966       | DB00042       |               |
| DB04016                                             | DB08222       | DB00768       | DB00541       | DB07712       |               |
| DB03978                                             | DB09099       | DB01203       | DB01643       | DB00934       |               |
| DB00511                                             | DB07562       | DB00254       | DB08568       | DB00160       |               |
| <b><u>Compound queries (ChEMBL compound id)</u></b> |               |               |               |               |               |
| CHEMBL1540570                                       | CHEMBL1333386 | CHEMBL1241950 | CHEMBL566340  | CHEMBL113621  | CHEMBL1347030 |
| CHEMBL204426                                        | CHEMBL164660  | CHEMBL1585390 | CHEMBL432038  | CHEMBL65374   | CHEMBL181633  |
| CHEMBL1784637                                       | CHEMBL319557  | CHEMBL1356395 | CHEMBL244990  | CHEMBL7204    | CHEMBL140872  |
| CHEMBL4213352                                       | CHEMBL1544947 | CHEMBL1969506 | CHEMBL91636   | CHEMBL2377590 | CHEMBL121405  |
| CHEMBL1760035                                       | CHEMBL1437753 | CHEMBL1561738 | CHEMBL1887153 | CHEMBL1402587 | CHEMBL1406702 |
| CHEMBL1583049                                       | CHEMBL2333956 | CHEMBL1565328 | CHEMBL93577   | CHEMBL76897   | CHEMBL1377687 |
| CHEMBL1550048                                       | CHEMBL2380394 | CHEMBL3193196 | CHEMBL1650951 | CHEMBL1519472 | CHEMBL266292  |
| CHEMBL2403369                                       | CHEMBL332898  | CHEMBL1459746 | CHEMBL2004118 | CHEMBL4209440 | CHEMBL4095596 |
| CHEMBL28079                                         | CHEMBL673     | CHEMBL2414354 | CHEMBL1405834 | CHEMBL7724    | CHEMBL476513  |
| CHEMBL1427061                                       | CHEMBL2312168 | CHEMBL3335300 | CHEMBL4168669 | CHEMBL2001712 | CHEMBL1558070 |
| CHEMBL1200348                                       | CHEMBL1347071 | CHEMBL4293085 | CHEMBL1425715 | CHEMBL1998953 | CHEMBL1457902 |
| CHEMBL3986068                                       | CHEMBL24057   | CHEMBL3647677 | CHEMBL2396719 | CHEMBL2315244 | CHEMBL199405  |
| CHEMBL242644                                        | CHEMBL2112774 | CHEMBL17645   | CHEMBL4069601 | CHEMBL254857  | CHEMBL59687   |
| CHEMBL3670703                                       | CHEMBL3401990 | CHEMBL3212972 | CHEMBL1417159 | CHEMBL1611170 | CHEMBL403402  |
| CHEMBL45                                            | CHEMBL1451772 | CHEMBL1525599 | CHEMBL448784  | CHEMBL1313485 | CHEMBL3622193 |
| CHEMBL453066                                        | CHEMBL1411285 | CHEMBL12375   | CHEMBL1343689 | CHEMBL4080797 | CHEMBL1454931 |
| CHEMBL302998                                        | CHEMBL31354   | CHEMBL1987579 | CHEMBL4087906 | CHEMBL1452003 | CHEMBL294878  |
| CHEMBL1112                                          | CHEMBL1422230 | CHEMBL1558822 | CHEMBL1966722 | CHEMBL1550184 | CHEMBL498373  |
| CHEMBL352039                                        | CHEMBL3586404 | CHEMBL1329712 | CHEMBL1086997 | CHEMBL1589224 | CHEMBL491771  |
| CHEMBL576409                                        | CHEMBL310843  | CHEMBL2324753 | CHEMBL2003304 | CHEMBL381207  | CHEMBL1337226 |
| CHEMBL164                                           | CHEMBL67716   | CHEMBL1967094 | CHEMBL303313  | CHEMBL1311826 | CHEMBL3128043 |
| CHEMBL1558893                                       | CHEMBL1583414 | CHEMBL97333   | CHEMBL398765  | CHEMBL4288256 | CHEMBL460291  |

|                                                                                                                                                                        |               |               |               |               |               |
|------------------------------------------------------------------------------------------------------------------------------------------------------------------------|---------------|---------------|---------------|---------------|---------------|
| CHEMBL1999630                                                                                                                                                          | CHEMBL553833  | CHEMBL1522275 | CHEMBL1602926 | CHEMBL4087132 | CHEMBL1309430 |
| CHEMBL1241770                                                                                                                                                          | CHEMBL322970  | CHEMBL1813315 | CHEMBL236902  | CHEMBL284377  | CHEMBL580727  |
| CHEMBL1076                                                                                                                                                             | CHEMBL25230   | CHEMBL214332  | CHEMBL4090770 | CHEMBL1974574 | CHEMBL3608450 |
| CHEMBL1242977                                                                                                                                                          | CHEMBL1980178 | CHEMBL1555396 | CHEMBL1976499 | CHEMBL123443  | CHEMBL405317  |
| CHEMBL1336469                                                                                                                                                          | CHEMBL1586726 | CHEMBL3639695 | CHEMBL1391256 | CHEMBL504791  | CHEMBL1498886 |
| CHEMBL457504                                                                                                                                                           | CHEMBL86931   | CHEMBL428496  | CHEMBL1966279 | CHEMBL45891   | CHEMBL1562333 |
| CHEMBL568385                                                                                                                                                           | CHEMBL3093311 | CHEMBL1969735 | CHEMBL1078178 | CHEMBL1982383 | CHEMBL1328369 |
| CHEMBL3660186                                                                                                                                                          | CHEMBL600     | CHEMBL1984842 | CHEMBL471043  | CHEMBL1802360 | CHEMBL3586577 |
| CHEMBL1084969                                                                                                                                                          | CHEMBL3976721 | CHEMBL1554    | CHEMBL2387265 | CHEMBL225071  |               |
| CHEMBL80                                                                                                                                                               | CHEMBL600336  | CHEMBL276140  | CHEMBL313842  | CHEMBL1983449 |               |
| CHEMBL2385591                                                                                                                                                          | CHEMBL1230020 | CHEMBL3969665 | CHEMBL481245  | CHEMBL3800138 |               |
| CHEMBL1288582                                                                                                                                                          | CHEMBL317956  | CHEMBL1971947 | CHEMBL315538  | CHEMBL3408737 |               |
| <b>Combinatory term queries</b>                                                                                                                                        |               |               |               |               |               |
| <b>(UniProt protein acc.   DrugBank drug id   ChEMBL compound id   Pathway name   Disease name   HPO name)</b>                                                         |               |               |               |               |               |
| Q96FG2   DB04400   CHEMBL281211   Tyrosine metabolism   Renal-hepatic-pancreatic dysplasia   Proximal lower limb amyotrophy                                            |               |               |               |               |               |
| Q86X18   DB08150   CHEMBL2205832   D-Glutamine and D-glutamate metabolism   Congenital myasthenic syndromes with glycosylation defect   Alveolar rhabdomyosarcoma      |               |               |               |               |               |
| Q6IAA8   DB08149   CHEMBL2004417   One carbon pool by folate   Juvenile polyposis of infancy   Hyperhomocystinemia                                                     |               |               |               |               |               |
| Q9H9Q4   DB05688   CHEMBL261387   alpha-Linolenic acid metabolism   focal segmental glomerulosclerosis   Impacted tooth                                                |               |               |               |               |               |
| Q92794   DB03144   CHEMBL1365701   One carbon pool by folate   Wilson-Turner syndrome   White hair                                                                     |               |               |               |               |               |
| Q9BYE7   DB03977   CHEMBL1602632   Vitamin digestion and absorption   Lung Lymphangioliomyomatosis   Generalized hypotonia due to defect at the neuromuscular junction |               |               |               |               |               |
| Q9UKW4   DB00810   CHEMBL2337697   Pantothenate and CoA biosynthesis   Juvenile polyposis of infancy   Incomplete partition of the cochlea                             |               |               |               |               |               |
| P05112   DB00772   CHEMBL1452003   Proximal tubule bicarbonate reclamation   Achondrogenesis   Elevated plasma branched chain amino acids                              |               |               |               |               |               |
| O75603   DB03632   CHEMBL3883820   Nitrogen metabolism   Monilethrix   Chronic tubulointerstitial nephritis                                                            |               |               |               |               |               |
| Q6E0U4   DB07707   CHEMBL3098606   Renin-angiotensin system   Phosphoenolpyruvate carboxykinase deficiency   Testicular dysgenesis                                     |               |               |               |               |               |
| Q86X02   DB12228   CHEMBL572163   Biotin metabolism   Bilateral striopallidodentate calcinosis   Respiratory paralysis                                                 |               |               |               |               |               |
| O43293   DB08855   CHEMBL1602926   Autophagy   Pseudoxanthoma elasticum   Thickening of the glomerular basement membrane                                               |               |               |               |               |               |
| P21964   DB08248   CHEMBL1370189   DNA replication   Polyglucosan body myopathy   Type II transferrin isoform profile                                                  |               |               |               |               |               |
| O43918   DB01520   CHEMBL326962   DNA replication   cirrhosis of liver   Aplasia of the ovary                                                                          |               |               |               |               |               |
| Q9Y239   DB01036   CHEMBL2011154   Aldosterone-regulated sodium reabsorption   Multiple osteochondromas   Abnormal pelvis bone morphology                              |               |               |               |               |               |
| O14654   DB11275   CHEMBL3590081   Glycosphingolipid biosynthesis   Duane retraction syndrome   Hepatic cysts                                                          |               |               |               |               |               |
| Q92614   DB04707   CHEMBL1471698   Glycosylphosphatidylinositol (GPI)-anchor biosynthesis   hyperthyroxinemia   Macular hypoplasia                                     |               |               |               |               |               |
| Q9UJ3   DB08371   CHEMBL317956   Butanoate metabolism   Intermediate maple syrup urine disease   Streak ovary                                                          |               |               |               |               |               |
| Q14088   DB07795   CHEMBL1304004   Glycosphingolipid biosynthesis   Hypotonia - cystinuria syndrome   Low back pain                                                    |               |               |               |               |               |
| Q8NFG4   DB09409   CHEMBL4083333   Glycosaminoglycan degradation   Perrault syndrome   Tibial torsion                                                                  |               |               |               |               |               |
| Q9H078   DB04930   CHEMBL1324434   Glycosphingolipid biosynthesis   tibia, hypoplasia or aplasia of, with polydactyly   Hepatic necrosis                               |               |               |               |               |               |
| Q9Y561   DB00890   CHEMBL1491933   Phenylalanine, tyrosine and tryptophan biosynthesis   Jackson-Weiss syndrome   Agensis of lateral incisor                           |               |               |               |               |               |
| Q9Y6D6   DB06713   CHEMBL1597827   Valine, leucine and isoleucine biosynthesis   Idiopathic ventricular fibrillation, not Brugada type   Right-to-left shunt           |               |               |               |               |               |
| Q02410   DB03948   CHEMBL1509338   SNARE interactions in vesicular transport   Myoclonus-dystonia syndrome   Lingual dystonia                                          |               |               |               |               |               |
| Q99593   DB02835   CHEMBL4072879   Pentose and glucuronate interconversions   Ehlers-Danlos syndrome, periodontitis type   Elevated creatine kinase after exercise     |               |               |               |               |               |
| Q96GT9   DB00245   CHEMBL1586534   Selenocompound metabolism   Autosomal recessive progressive external ophthalmoplegia   Abnormality of neck blood vessel             |               |               |               |               |               |

|                                                                                                                                                                                         |
|-----------------------------------------------------------------------------------------------------------------------------------------------------------------------------------------|
| Q13813   DB08808   ChEMBL489738   Starch and sucrose metabolism   Asperger syndrome   Long foot                                                                                         |
| Q99819   DB00651   ChEMBL2205362   Renin-angiotensin system   Krabbe disease   Hyperlysinuria                                                                                           |
| P07711   DB00892   ChEMBL536950   Renin-angiotensin system   obsolete_polycystic lipomembranous osteodysplasia with sclerosing leukoencephalopathy   Abnormality of the Eustachian tube |
| O14497   DB07636   ChEMBL1172251   Riboflavin metabolism   Muscle-eye-brain disease   Misalignment of incisors                                                                          |
| P02686   DB09068   ChEMBL2441342   Mannose type O-glycan biosynthesis   alcohol dependence   Periventricular heterotopia                                                                |
| Q9NX58   DB03109   ChEMBL1331514   Glycosphingolipid biosynthesis   Hyperostosis corticalis generalisata   Adenocarcinoma of the colon                                                  |
| O60936   DB00798   ChEMBL2425959   Other glycan degradation   Non-acquired isolated growth hormone deficiency   Morning myoclonic jerks                                                 |
| Q9NV29   DB00451   ChEMBL272401   Phenylalanine metabolism   Dehydrated hereditary stomatocytosis   Colonic diverticula                                                                 |
| P50553   DB01154   ChEMBL258405   Renin-angiotensin system   habitual abortion   Impaired visuospatial constructive cognition                                                           |
| P23297   DB00584   ChEMBL1241775   Linoleic acid metabolism   Subcortical band heterotopia   Multiple impacted teeth                                                                    |
| Q13951   DB00262   ChEMBL1076478   Propanoate metabolism   Hypocalcified amelogenesis imperfecta   Pulmonary cyst                                                                       |
| Q13144   DB04566   ChEMBL241115   Arginine biosynthesis   Chronic mucocutaneous candidosis   Cavum septum pellucidum                                                                    |
| O43707   DB06271   ChEMBL3945264   Citrate cycle (TCA cycle)   persistent fetal circulation syndrome   Pancreatic hypoplasia                                                            |
| Q969H8   DB09059   ChEMBL1389047   Fat digestion and absorption   Autosomal recessive cerebellar ataxia   Fatigable weakness of distal limb muscles                                     |
| P20774   DB07715   ChEMBL3600698   Glycosphingolipid biosynthesis   hepatocellular carcinoma   Retinal arteriolar tortuosity                                                            |
| P20783   DB01120   ChEMBL243712   RNA polymerase   Hereditary chronic pancreatitis   Narcolepsy                                                                                         |
| Q8TAC9   DB00498   ChEMBL177820   Folate biosynthesis   cataract   Abnormal size of pituitary gland                                                                                     |
| P09681   DB06822   ChEMBL1995948   Primary bile acid biosynthesis   osteoporosis   Optic neuritis                                                                                       |
| O75445   DB00884   ChEMBL143210   Butanoate metabolism   type II hypersensitivity reaction disease   Lack of insight                                                                    |
| Q9BRP4   DB00422   ChEMBL4293085   Phenylalanine metabolism   Cornelia de Lange syndrome   Entrapment neuropathy                                                                        |
| Q5T5X7   DB05149   ChEMBL164747   Glycosphingolipid biosynthesis   Barrett's esophagus   Sinus bradycardia                                                                              |
| Q00975   DB04217   ChEMBL1516500   Other glycan degradation   Autosomal agammaglobulinemia   Abnormality of the urachus                                                                 |
| O94955   DB01011   ChEMBL1472703   Selenocompound metabolism   Immunodeficiency due to a complement cascade protein anomaly   Moyamoya phenomenon                                       |
| P20809   DB05078   ChEMBL1515004   Folate biosynthesis   Hereditary spherocytosis   Hyperechogenic kidneys                                                                              |
| Q9HBW0   DB04223   ChEMBL3401988   Detoxification of Reactive Oxygen Species   Multiple pterygium syndrome   Abnormality of renin-angiotensin system                                    |
| O60673   DB00117   ChEMBL1369262   Signal regulatory protein family interactions   Prader-Willi syndrome   Vertebral wedging                                                            |
| Q8WUH2   DB00716   ChEMBL3628807   Initiation of Nuclear Envelope Reformation   Aniridia   EEG with polyspike wave complexes                                                            |
| Q14802   DB01013   ChEMBL1526414   Signaling by ERBB2   Sideroblastic anemia   Head titubation                                                                                          |
| Q9H6W3   DB09099   ChEMBL2012686   Negative regulation of FGFR3 signaling   Frontotemporal dementia and amyotrophic lateral sclerosis   Supernumerary vertebrae                         |
| P62508   DB13151   ChEMBL468167   Muscarinic acetylcholine receptors   Melanoma   Abnormality of the protein C anticoagulant pathway                                                    |
| Q8IYB3   DB01247   ChEMBL3110005   Passive transport by Aquaporins   Cerebral cavernous malformation   True hermaphroditism                                                             |
| Q8TEX9   DB12334   ChEMBL1529320   ATF6 (ATF6-alpha) activates chaperones   Infantile hemangioma   Neonatal insulin-dependent diabetes mellitus                                         |
| Q08ER8   DB04327   ChEMBL407734   Truncations of AMER1 destabilize the destruction complex   Essential tremor   Civatte bodies                                                          |
| Q7KZ17   DB00574   ChEMBL1385673   Choline catabolism   Familial amyloidosis   Cardiac shunt                                                                                            |
| Q13569   DB02900   ChEMBL2007375   Removal of the Flap Intermediate   ATP synthase deficiency   Abnormal brain lactate level by MRS                                                     |
| P18074   DB13944   ChEMBL559015   STING mediated induction of host immune responses   MELAS Syndrome   Femoral hernia                                                                   |
| O60732   DB00876   ChEMBL3196267   Scavenging by Class F Receptors   Vulvar cancer   Thyroid hyperplasia                                                                                |
| Q5VSL9   DB04299   ChEMBL118919   Synthesis of IP2, IP, and Ins in the cytosol   Behcet disease   Reduced antithrombin III activity                                                     |
| P13674   DB09073   ChEMBL4295242   CD209 (DC-SIGN) signaling   Hypomagnesemia   Male sexual dysfunction                                                                                 |
| Q9H270   DB03536   ChEMBL1306267   PKA-mediated phosphorylation of CREB   Capillary malformation-arteriovenous malformation   Proximal symphalangism                                    |

|                                                                                                                                                                                                                   |
|-------------------------------------------------------------------------------------------------------------------------------------------------------------------------------------------------------------------|
| Q9Y6Y9   DB03501   ChEMBL3355683   POU5F1 (OCT4), SOX2, NANOG repress genes related to differentiation   Malignant pleural mesothelioma   Abnormal muscle fiber protein expression                                |
| P28288   DB00579   ChEMBL533602   TGF-beta receptor signaling in EMT (epithelial to mesenchymal transition)   Congenital diarrhea   Hypoplastic scapulae                                                          |
| P61158   DB08299   ChEMBL1329507   mRNA Editing: C to U Conversion   Tetralogy of Fallot   Facial hirsutism                                                                                                       |
| P09565   DB00335   ChEMBL318018   ERBB2 Activates PTK6 Signaling   Spondyloepimetaphyseal dysplasia   Chronic hepatitis due to cryptosporidium infection                                                          |
| Q8NE63   DB00449   ChEMBL192293   Trafficking of myristoylated proteins to the cilium   Griscelli syndrome   Absent axillary hair                                                                                 |
| Q8N2N9   DB01954   ChEMBL252403   rRNA modification in the mitochondrion   Mantle cell lymphoma   Hyperchloremia                                                                                                  |
| P15692   DB02032   ChEMBL1668605   Ion channel transport   Syndromic craniosynostoses   Hypereosinophilia                                                                                                         |
| P00414   DB04325   ChEMBL1474625   MECP2 regulates transcription factors   X-linked lymphoproliferative syndrome   Vestibular areflexia                                                                           |
| Q8TBB5   DB01821   ChEMBL2313377   Transcriptional regulation by the AP-2 (TFAP2) family of transcription factors   Ectopia lentis   Testicular dysgenesis                                                        |
| O75971   DB05260   ChEMBL2323582   Metallothioneins bind metals   Dent disease   Carotid artery stenosis                                                                                                          |
| P31321   DB00222   ChEMBL2443204   Scavenging by Class H Receptors   Distal arthrogyrosis   Prolonged PR interval                                                                                                 |
| P36402   DB02559   ChEMBL219586   Glucocorticoid biosynthesis   Merkel cell carcinoma   Prominent digit pad                                                                                                       |
| P11684   DB08271   ChEMBL491771   Regulation of APC/C activators between G1/S and early anaphase   Saethre-Chotzen syndrome   Aplasia/Hypoplasia of the distal phalanges of the toes                              |
| Q8NFA0   DB08234   ChEMBL80155   Regulation of signaling by CBL   Ehlers-Danlos syndrome kyphoscoliosis type   Aplasia/Hypoplasia of the tragus                                                                   |
| Q9BW83   DB00883   ChEMBL295806   RAF-independent MAPK1/3 activation   Wiskott-Aldrich syndrome   Narrow vertebral interpedicular distance                                                                        |
| Q9H3F6   DB06021   ChEMBL111589   p75NTR negatively regulates cell cycle via SC1   Renal hypouricemia   Gastrointestinal eosinophilia                                                                             |
| Q6ZP80   DB01288   ChEMBL3356927   Sodium-coupled sulphate, di- and tri-carboxylate transporters   Striate palmoplantar keratoderma   Partial atrioventricular canal defect                                       |
| Q13698   DB01842   ChEMBL2007375   PKA-mediated phosphorylation of CREB   Complement regulatory protein defects   Abnormal circulating serine family amino acid concentration                                     |
| Q8NFD5   DB09205   ChEMBL1501724   Transcription of E2F targets under negative control by p107 (RBL1) and p130 (RBL2) in complex with HDAC1   Bare lymphocyte syndrome type2   Thick nasal alae                   |
| Q12772   DB00093   ChEMBL1511350   Interaction With The Zona Pellucida   Aicardi-Goutieres syndrome   Abnormal atrioventricular connection                                                                        |
| P17181   DB12095   ChEMBL2385582   Phosphorylation of CD3 and TCR zeta chains   Malignant paraganglioma   Hypolipidemia                                                                                           |
| Q8IYS1   DB08149   ChEMBL340211   TRAF6 mediated IRF7 activation   Alpha-ketoglutarate dehydrogenase complex deficiency   Sparse lower eyelashes                                                                  |
| O43143   DB07557   ChEMBL1395196   Termination of O-glycan biosynthesis   Chronic lymphocytic leukemia   Full-thickness macular hole                                                                              |
| P22001   DB02068   ChEMBL2387068   Competing endogenous RNAs (ceRNAs) regulate PTEN translation   Stickler syndrome   Reduced factor VIII activity                                                                |
| P10145   DB01863   ChEMBL1463349   CYP2E1 reactions   Primary hyperparathyroidism   Abnormality of the endometrium                                                                                                |
| Q9C0J9   DB07950   ChEMBL3935597   The canonical retinoid cycle in rods (twilight vision)   Tyrosinemia   Chronic mucocutaneous candidiasis                                                                       |
| P08571   DB00685   ChEMBL3912801   eNOS activation   Primary hyperoxaluria   Bladder diverticulum                                                                                                                 |
| P36578   DB05266   ChEMBL1256655   Gap-filling DNA repair synthesis and ligation in GG-NER   Hermansky-Pudlak syndrome   Platelet anisocytosis                                                                    |
| P05113   DB00135   ChEMBL203637   Regulation of insulin secretion   Mitochondrial trifunctional protein deficiency   No social interaction                                                                        |
| Q03518   DB07771   ChEMBL196598   TFAP2 (AP-2) family regulates transcription of cell cycle factors   Mosaic variegated aneuploidy syndrome   Ectropion of lower eyelids                                          |
| O75132   DB03904   ChEMBL1630940   Creatine metabolism   SEMD with joint laxity type   Y-linked inheritance                                                                                                       |
| Q86UD4   DB02180   ChEMBL4063105   TWIK related potassium channel (TREK)   Short rib-polydactyly syndrome   Marked muscular hypertrophy                                                                           |
| Q9BW62   DB00083   ChEMBL1303   CREB phosphorylation   Frontotemporal dementia and amyotrophic lateral sclerosis   Excessive daytime sleepiness                                                                   |
| Q01658   DB05037   ChEMBL1363706   Transport of gamma-carboxylated protein precursors from the endoplasmic reticulum to the Golgi apparatus   Brachydactyly   Morphological abnormality of the semicircular canal |

**Table S9.** Statistics regarding all frequently observed terms in 1365 CROsBAR knowledge graphs constructed with random term queries.

| Biological component type                      | Term id         | Term name                                                                   | Count (g) | Observed frequency (g/G) | Mean observed frequency of the component |
|------------------------------------------------|-----------------|-----------------------------------------------------------------------------|-----------|--------------------------|------------------------------------------|
| Gene/Protein (Core)                            | P02545          | LMNA                                                                        | 78        | 0.0571                   | 0.0025                                   |
|                                                | P10636          | MAPT                                                                        | 58        | 0.0425                   | 0.0025                                   |
|                                                | P51151          | RAB9A                                                                       | 49        | 0.0359                   | 0.0025                                   |
|                                                | P05177          | CYP1A2                                                                      | 45        | 0.0330                   | 0.0025                                   |
|                                                | Q16637          | SMN1                                                                        | 45        | 0.0330                   | 0.0025                                   |
| Gene/Protein (Neighboring)                     | Q8TDT2          | GPR152                                                                      | 74        | 0.0542                   | 0.0023                                   |
|                                                | O76011          | KRT34                                                                       | 52        | 0.0381                   | 0.0023                                   |
|                                                | Q8NBJ4          | GOLM1                                                                       | 45        | 0.0330                   | 0.0023                                   |
|                                                | Q9Y320          | TMX2                                                                        | 42        | 0.0308                   | 0.0023                                   |
|                                                | Q9NUH8          | TMEM14B                                                                     | 37        | 0.0271                   | 0.0023                                   |
| Reactome Pathway                               | R-HSA-418594    | G alpha (i) signalling events                                               | 49        | 0.0359                   | 0.0055                                   |
|                                                | R-HSA-9027307   | Biosynthesis of maresin-like SPMs                                           | 49        | 0.0359                   | 0.0055                                   |
|                                                | R-HSA-390696    | Adrenoceptors                                                               | 46        | 0.0337                   | 0.0055                                   |
|                                                | R-HSA-390651    | Dopamine receptors                                                          | 44        | 0.0322                   | 0.0055                                   |
|                                                | R-HSA-352238    | Breakdown of the nuclear lamina                                             | 43        | 0.0315                   | 0.0055                                   |
| KEGG Pathway                                   | hsa01100        | Metabolic pathways                                                          | 310       | 0.2271                   | 0.0349                                   |
|                                                | hsa04080        | Neuroactive ligand-receptor interaction                                     | 168       | 0.1231                   | 0.0349                                   |
|                                                | hsa04151        | PI3K-Akt signaling pathway                                                  | 137       | 0.1004                   | 0.0349                                   |
|                                                | hsa04010        | MAPK signaling pathway                                                      | 125       | 0.0916                   | 0.0349                                   |
|                                                | hsa04510        | Focal adhesion                                                              | 113       | 0.0828                   | 0.0349                                   |
| EFO Disease                                    | Orphanet:300751 | Familial dilated cardiomyopathy with conduction defect due to LMNA mutation | 40        | 0.0293                   | 0.0029                                   |
|                                                | Orphanet:99750  | Atypical progressive supranuclear palsy                                     | 30        | 0.0220                   | 0.0029                                   |
|                                                | EFO:0003829     | alcohol dependence                                                          | 30        | 0.0220                   | 0.0029                                   |
|                                                | Orphanet:90153  | Mandibuloacral dysplasia with type A lipodystrophy                          | 29        | 0.0212                   | 0.0029                                   |
|                                                | Orphanet:740    | Hutchinson-Gilford progeria syndrome                                        | 29        | 0.0212                   | 0.0029                                   |
| KEGG Disease                                   | H00601          | Hutchinson-Gilford progeria syndrome                                        | 54        | 0.0396                   | 0.0044                                   |
|                                                | H00606          | Early infantile epileptic encephalopathy                                    | 50        | 0.0366                   | 0.0044                                   |
|                                                | H01611          | Alcohol dependence                                                          | 49        | 0.0359                   | 0.0044                                   |
|                                                | H01450          | Obsessive-compulsive disorder                                               | 44        | 0.0322                   | 0.0044                                   |
|                                                | H00077          | Progressive supranuclear palsy                                              | 44        | 0.0322                   | 0.0044                                   |
| Phenotype (HPO)                                | HP:0002528      | Granulovacuolar degeneration                                                | 25        | 0.0183                   | 0.0019                                   |
|                                                | HP:0012166      | Skin-picking                                                                | 25        | 0.0183                   | 0.0019                                   |
|                                                | HP:0031825      | Freezing of gait                                                            | 23        | 0.0168                   | 0.0019                                   |
|                                                | HP:0031937      | Tachylalia                                                                  | 23        | 0.0168                   | 0.0019                                   |
|                                                | HP:0002439      | Frontolimbic dementia                                                       | 23        | 0.0168                   | 0.0019                                   |
| Drug                                           | DB12010         | Fostamatinib                                                                | 60        | 0.0440                   | 0.0023                                   |
|                                                | DB00715         | Paroxetine                                                                  | 47        | 0.0344                   | 0.0023                                   |
|                                                | DB00433         | Prochlorperazine                                                            | 47        | 0.0344                   | 0.0023                                   |
|                                                | DB00243         | Ranolazine                                                                  | 40        | 0.0293                   | 0.0023                                   |
|                                                | DB00924         | Cyclobenzaprine                                                             | 38        | 0.0278                   | 0.0023                                   |
| Compound (Experimentally measured bioactivity) | CHEMBL1214871   | CHEMBL1214871                                                               | 15        | 0.0110                   | 0.0010                                   |
|                                                | CHEMBL1762790   | CHEMBL1762790                                                               | 10        | 0.0073                   | 0.0010                                   |
|                                                | CHEMBL3939307   | CHEMBL3939307                                                               | 10        | 0.0073                   | 0.0010                                   |
|                                                | CHEMBL80919     | CHEMBL80919                                                                 | 9         | 0.0066                   | 0.0010                                   |
|                                                | CHEMBL338988    | CHEMBL338988                                                                | 9         | 0.0066                   | 0.0010                                   |
| Compound (Predicted)                           | CHEMBL551249    | CHEMBL551249                                                                | 20        | 0.0147                   | 0.0013                                   |
|                                                | CHEMBL553548    | CHEMBL553548                                                                | 20        | 0.0147                   | 0.0013                                   |
|                                                | CHEMBL1822108   | CHEMBL1822108                                                               | 20        | 0.0147                   | 0.0013                                   |
|                                                | CHEMBL547077    | CHEMBL547077                                                                | 20        | 0.0147                   | 0.0013                                   |
|                                                | CHEMBL551228    | CHEMBL551228                                                                | 19        | 0.0139                   | 0.0013                                   |
